# Supplementary material for: Pathogen diversity drives the evolution of generalist MHC-II alleles in human populations
Source: PLoS Biol. 2019 Jan 31;17(1):e3000131. doi: 10.1371/journal.pbio.3000131 (PMC6372212; doi:10.1371/journal.pbio.3000131)
Supplement: S4 Data — (XLSX) [file pbio.3000131.s017.xlsx]

## Sheet: Figure 1
Panel A			Panel B			Panel C			Panel D
Population Cluster	Extracellular pathogen diversity	Predicted population-level promiscuity	Population Cluster	Intracellular pathogen diversity	Predicted population-level promiscuity	Population Cluster	Extracellular pathogen diversity	In vitro population-level promiscuity	Population Cluster	Intracellular pathogen diversity	In vitro population-level promiscuity
1	133	-0.196998	1	137	-0.196998	1	133	1.11361	1	137	1.11361
2	122.923	-0.168556	2	107.231	-0.168556	2	122.923	0.146648	2	107.231	0.146648
3	101.444	-0.202665	3	103.333	-0.202665	3	101.444	-0.0995103	3	103.333	-0.0995103
4	103	-0.160716	4	114.462	-0.160716	4	103	-0.273421	4	114.462	-0.273421
5	97.1429	-0.11278	5	107.857	-0.11278	5	97.5	-0.192492	5	108.5	-0.192492
6	104	-0.22775	6	107.5	-0.22775	6	104	-0.377814	6	107.5	-0.377814
7	110.667	-0.0827164	7	113	-0.0827164	7	108	-0.223242	7	106	-0.223242
8	136	0.156044	8	122	0.156044	8	136	0.79177	8	122	0.79177
9	126.25	0.181781	9	116	0.181781	9	126.25	0.505569	9	116	0.505569
10	120	0.359695	10	101	0.359695	10	120	0.38046	10	101	0.38046
11	128.25	-0.159746	11	114.75	-0.159746	11	128.25	0.578256	11	114.75	0.578256
12	120	-0.00649035	12	101	-0.00649035	12	120	0.388413	12	101	0.388413
13	125.333	-0.0564164	13	108	-0.0564164	13	125.333	0.393439	13	108	0.393439
14	125	-0.398632	14	137	-0.398632	14	125	-0.167211	14	137	-0.167211
15	108	-0.506822	15	121	-0.506822	15	108	-0.179822	15	121	-0.179822
16	124	-0.122858	16	107	-0.122858	16	124	0.578886	16	107	0.578886
17	132.5	0.254719	17	124	0.254719	17	132.5	0.759122	17	124	0.759122
18	136	0.18779	18	122	0.18779	18	136	0.453432	18	122	0.453432
19	114	-0.253723	19	126	-0.253723	20	92	0.0287995	20	97	0.0287995
20	92	-0.208436	20	97	-0.208436	22	136	1.05855	22	122	1.05855
21	125	0.143565	21	137	0.143565	24	136	0.686998	24	122	0.686998
22	136	0.709409	22	122	0.709409	25	100	0.670292	25	105	0.670292
23	109	-0.462415	23	112	-0.462415	26	115	-0.093948	26	117	-0.093948
24	136	0.202163	24	122	0.202163	32	111	0.0879201	32	110	0.0879201
25	100	-0.284189	25	105	-0.284189	33	120	1.20509	33	101	1.20509
26	115	-0.337279	26	117	-0.337279	35	120	0.394859	35	101	0.394859
27	115	0.103087	27	117	0.103087	36	120	0.399671	36	101	0.399671
28	106	-0.229066	28	107	-0.229066	37	120	0.322091	37	101	0.322091
29	106	-0.151927	29	107	-0.151927
30	114	-0.593063	30	126	-0.593063
31	114	-0.384641	31	126	-0.384641
32	111	-0.318247	32	110	-0.318247
33	120	-0.184803	33	101	-0.184803
34	120	-0.302678	34	101	-0.302678
35	120	-0.31122	35	101	-0.31122
36	120	0.189544	36	101	0.189544
37	120	-0.520339	37	101	-0.520339

## Sheet: Figure 2
Panel A		Panel B
Allele	Promiscuity level	Population Cluster	Extracellular Pathogen count	HLA-DRB1*12:02 allele frequency in cluster
DRB1*04:03	0.0040877	2	122.833	0.0504448
DRB1*15:02	0.00483092	8	136	0.258
DRB1*14:05	0.0163508	9	126.25	0.279749
DRB1*03:01	0.0185805	10	120	0.272353
DRB1*14:01	0.0219249	11	128.25	0.113057
DRB1*09:01	0.0386473	12	120	0.173788
DRB1*15:01	0.0416202	13	125.333	0.154013
DRB1*04:04	0.0423634	16	124	0.203511
DRB1*04:05	0.0442215	17	132.5	0.365
DRB1*15:04	0.0471944	18	136	0.217
DRB1*14:04	0.0549981	22	136	0.556
DRB1*11:01	0.0761799	24	136	0.319
DRB1*07:01	0.0862133	33	120	0.13
DRB1*16:02	0.0895578	34	120	0.0454546
DRB1*08:03	0.113712	35	120	0.05
DRB1*12:02	0.312523	36	120	0.287129
		37	120	0

## Sheet: Figure 3
Panel A			Panel B
Allele pair	Protein distance	Promiscuity fold change	Site	Sequence variability	Promiscuity fragility
DRB1_01_01_06--DRB1_01_02_01	0	1.57089	9	0.706237	1.16667
DRB1_01_01_06--DRB1_01_20_01	0	1.54078	11	1.5372	1.5411
DRB1_01_01_06--DRB1_03_01_08	0.058	15.94	13	2.06819	1.66601
DRB1_01_01_06--DRB1_03_02_01	0.058	113.857	26	0.768746	1.53452
DRB1_01_01_06--DRB1_03_06	0.058	22.7714	28	0.754252	1.2
DRB1_01_01_06--DRB1_03_07	0.058	10.0886	30	0.888827	1.13158
DRB1_01_01_06--DRB1_03_15	0.058	12.8548	47	0.992159	1.24258
DRB1_01_01_06--DRB1_04_01_01	0.058	8.56989	57	1.23194	1.78793
DRB1_01_01_06--DRB1_04_02_01	0.058	398.5	67	1.56705	2.17606
DRB1_01_01_06--DRB1_04_03_02	0.058	72.4545	70	1.33343	1.85714
DRB1_01_01_06--DRB1_04_04_01	0.058	6.99123	71	1.2884	2.17083
DRB1_01_01_06--DRB1_04_05_01	0.058	6.69748	74	1.54192	2.70801
DRB1_01_01_06--DRB1_04_06_02	0.051	72.4545	77	0.33729	1.15993
DRB1_01_01_06--DRB1_04_07_01	0.058	132.833	78	0.146094	1.34146
DRB1_01_01_06--DRB1_04_08_01	0.058	12.0758	81	0	1.2807
DRB1_01_01_06--DRB1_04_10_03	0.058	2.14825	85	0.376715	1.12941
DRB1_01_01_06--DRB1_04_11_01	0.058	14.7593	86	0.999687	2.05324
DRB1_01_01_06--DRB1_04_15	0.065	13.9825	89	0	1.18503
DRB1_01_01_06--DRB1_04_16	0.065	8.56989	90	0	1.08559
DRB1_01_01_06--DRB1_04_32	0.065	6.99123
DRB1_01_01_06--DRB1_04_92	0.058	132.833
DRB1_01_01_06--DRB1_07_01_01_02	0.065	3.43534
DRB1_01_01_06--DRB1_07_04	0.065	13.7414
DRB1_01_01_06--DRB1_08_01_01	0.052	3.79524
DRB1_01_01_06--DRB1_08_02_02	0.052	99.625
DRB1_01_01_06--DRB1_08_03_02	0.052	2.60458
DRB1_01_01_06--DRB1_08_04_01	0.052	3.59009
DRB1_01_01_06--DRB1_08_06	0.052	1.63112
DRB1_01_01_06--DRB1_08_07	0.052	49.8125
DRB1_01_01_06--DRB1_08_09	0.058	99.625
DRB1_01_01_06--DRB1_08_11	0.052	44.2778
DRB1_01_01_06--DRB1_08_18	0.052	1.0389
DRB1_01_01_06--DRB1_09_01_10	0.038	7.66346
DRB1_01_01_06--DRB1_10_01_01_02	0.069	5.20915
DRB1_01_01_06--DRB1_11_01_08	0.052	3.8878
DRB1_01_01_06--DRB1_11_02_01	0.052	10.9178
DRB1_01_01_06--DRB1_11_03_01	0.052	4.40331
DRB1_01_01_06--DRB1_11_04_01	0.052	1.15675
DRB1_01_01_06--DRB1_11_05	0.052	3.27984
DRB1_01_01_06--DRB1_11_06_01	0.052	1.32612
DRB1_01_01_06--DRB1_11_08_02	0.052	1.3958
DRB1_01_01_06--DRB1_11_09	0.058	3.8878
DRB1_01_01_06--DRB1_11_11_01	0.052	79.7
DRB1_01_01_06--DRB1_11_12_01	0.052	3.8878
DRB1_01_01_06--DRB1_11_13_02	0.058	1.67086
DRB1_01_01_06--DRB1_11_14_01	0.052	44.2778
DRB1_01_01_06--DRB1_11_15	0.059	3.8878
DRB1_01_01_06--DRB1_11_19_01	0.052	4.06633
DRB1_01_01_06--DRB1_11_27_01	0.052	5.0443
DRB1_01_01_06--DRB1_11_32	0.052	10.0886
DRB1_01_01_06--DRB1_11_34	0.052	1.27102
DRB1_01_01_06--DRB1_12_01_01_02	0.072	1.15809
DRB1_01_01_06--DRB1_12_02_06	0.072	1.05521
DRB1_01_01_06--DRB1_12_06	0.065	1.15809
DRB1_01_01_06--DRB1_12_10	0.072	1.15809
DRB1_01_01_06--DRB1_13_01_13	0.052	10.9178
DRB1_01_01_06--DRB1_13_02_01	0.052	44.2778
DRB1_01_01_06--DRB1_13_03_01	0.045	2.1029
DRB1_01_01_06--DRB1_13_04	0.045	1.70299
DRB1_01_01_06--DRB1_13_05_01	0.052	3.8878
DRB1_01_01_06--DRB1_13_06	0.052	1.28548
DRB1_01_01_06--DRB1_13_10	0.052	1.70299
DRB1_01_01_06--DRB1_13_11_01	0.045	1.15675
DRB1_01_01_06--DRB1_13_12_01	0.045	1.36239
DRB1_01_01_06--DRB1_13_14_02	0.045	3.8878
DRB1_01_01_06--DRB1_13_17	0.052	5.73381
DRB1_01_01_06--DRB1_13_20	0.052	2.02799
DRB1_01_01_06--DRB1_13_26_01	0.052	8.47872
DRB1_01_01_06--DRB1_13_27	0.052	14.2321
DRB1_01_01_06--DRB1_13_36	0.052	66.4167
DRB1_01_01_06--DRB1_14_01_01	0.065	13.5085
DRB1_01_01_06--DRB1_14_02_01	0.052	2.27066
DRB1_01_01_06--DRB1_14_03_01	0.052	8.30208
DRB1_01_01_06--DRB1_14_04_01	0.065	5.38514
DRB1_01_01_06--DRB1_14_05_01	0.058	18.1136
DRB1_01_01_06--DRB1_14_06_01	0.052	1.20703
DRB1_01_01_06--DRB1_14_07_01	0.058	797
DRB1_01_01_06--DRB1_14_08	0.058	18.1136
DRB1_01_01_06--DRB1_14_14	0.052	199.25
DRB1_01_01_06--DRB1_14_17	0.052	1.27102
DRB1_01_01_06--DRB1_14_21	0.052	1.09285
DRB1_01_01_06--DRB1_14_54_05	0.058	13.5085
DRB1_01_01_06--DRB1_15_01_01_01	0.025	7.11607
DRB1_01_01_06--DRB1_15_02_01_01	0.025	61.3077
DRB1_01_01_06--DRB1_15_03_01_02	0.025	6.03788
DRB1_01_01_06--DRB1_15_04	0.025	6.27559
DRB1_01_01_06--DRB1_16_01_01	0.025	19.439
DRB1_01_01_06--DRB1_16_02_01_02	0.025	3.30705
DRB1_01_01_06--DRB1_16_03	0.032	19.439
DRB1_01_01_06--DRB1_16_04	0.025	199.25
DRB1_01_01_06--DRB1_16_09_02	0.025	9.16092
DRB1_01_02_01--DRB1_01_20_01	0	1.01954
DRB1_01_02_01--DRB1_03_01_08	0.058	25.04
DRB1_01_02_01--DRB1_03_02_01	0.058	178.857
DRB1_01_02_01--DRB1_03_06	0.058	35.7714
DRB1_01_02_01--DRB1_03_07	0.058	15.8481
DRB1_01_02_01--DRB1_03_15	0.058	20.1935
DRB1_01_02_01--DRB1_04_01_01	0.058	13.4624
DRB1_01_02_01--DRB1_04_02_01	0.058	626
DRB1_01_02_01--DRB1_04_03_02	0.058	113.818
DRB1_01_02_01--DRB1_04_04_01	0.058	10.9825
DRB1_01_02_01--DRB1_04_05_01	0.058	10.521
DRB1_01_02_01--DRB1_04_06_02	0.051	113.818
DRB1_01_02_01--DRB1_04_07_01	0.058	208.667
DRB1_01_02_01--DRB1_04_08_01	0.058	18.9697
DRB1_01_02_01--DRB1_04_10_03	0.058	3.37466
DRB1_01_02_01--DRB1_04_11_01	0.058	23.1852
DRB1_01_02_01--DRB1_04_15	0.065	21.9649
DRB1_01_02_01--DRB1_04_16	0.065	13.4624
DRB1_01_02_01--DRB1_04_32	0.065	10.9825
DRB1_01_02_01--DRB1_04_92	0.058	208.667
DRB1_01_02_01--DRB1_07_01_01_02	0.065	5.39655
DRB1_01_02_01--DRB1_07_04	0.065	21.5862
DRB1_01_02_01--DRB1_08_01_01	0.052	5.9619
DRB1_01_02_01--DRB1_08_02_02	0.052	156.5
DRB1_01_02_01--DRB1_08_03_02	0.052	4.0915
DRB1_01_02_01--DRB1_08_04_01	0.052	5.63964
DRB1_01_02_01--DRB1_08_06	0.052	1.03834
DRB1_01_02_01--DRB1_08_07	0.052	78.25
DRB1_01_02_01--DRB1_08_09	0.058	156.5
DRB1_01_02_01--DRB1_08_11	0.052	69.5556
DRB1_01_02_01--DRB1_08_18	0.052	1.51208
DRB1_01_02_01--DRB1_09_01_10	0.038	12.0385
DRB1_01_02_01--DRB1_10_01_01_02	0.069	8.18301
DRB1_01_02_01--DRB1_11_01_08	0.052	6.10732
DRB1_01_02_01--DRB1_11_02_01	0.052	17.1507
DRB1_01_02_01--DRB1_11_03_01	0.052	6.91713
DRB1_01_02_01--DRB1_11_04_01	0.052	1.81713
DRB1_01_02_01--DRB1_11_05	0.052	5.15226
DRB1_01_02_01--DRB1_11_06_01	0.052	2.08319
DRB1_01_02_01--DRB1_11_08_02	0.052	2.19264
DRB1_01_02_01--DRB1_11_09	0.058	6.10732
DRB1_01_02_01--DRB1_11_11_01	0.052	125.2
DRB1_01_02_01--DRB1_11_12_01	0.052	6.10732
DRB1_01_02_01--DRB1_11_13_02	0.058	2.62474
DRB1_01_02_01--DRB1_11_14_01	0.052	69.5556
DRB1_01_02_01--DRB1_11_15	0.059	6.10732
DRB1_01_02_01--DRB1_11_19_01	0.052	6.38776
DRB1_01_02_01--DRB1_11_27_01	0.052	7.92405
DRB1_01_02_01--DRB1_11_32	0.052	15.8481
DRB1_01_02_01--DRB1_11_34	0.052	1.23593
DRB1_01_02_01--DRB1_12_01_01_02	0.072	1.35645
DRB1_01_02_01--DRB1_12_02_06	0.072	1.4887
DRB1_01_02_01--DRB1_12_06	0.065	1.35645
DRB1_01_02_01--DRB1_12_10	0.072	1.35645
DRB1_01_02_01--DRB1_13_01_13	0.052	17.1507
DRB1_01_02_01--DRB1_13_02_01	0.052	69.5556
DRB1_01_02_01--DRB1_13_03_01	0.045	3.30343
DRB1_01_02_01--DRB1_13_04	0.045	2.67521
DRB1_01_02_01--DRB1_13_05_01	0.052	6.10732
DRB1_01_02_01--DRB1_13_06	0.052	2.01935
DRB1_01_02_01--DRB1_13_10	0.052	2.67521
DRB1_01_02_01--DRB1_13_11_01	0.045	1.81713
DRB1_01_02_01--DRB1_13_12_01	0.045	2.14017
DRB1_01_02_01--DRB1_13_14_02	0.045	6.10732
DRB1_01_02_01--DRB1_13_17	0.052	9.00719
DRB1_01_02_01--DRB1_13_20	0.052	3.18575
DRB1_01_02_01--DRB1_13_26_01	0.052	13.3191
DRB1_01_02_01--DRB1_13_27	0.052	22.3571
DRB1_01_02_01--DRB1_13_36	0.052	104.333
DRB1_01_02_01--DRB1_14_01_01	0.065	21.2203
DRB1_01_02_01--DRB1_14_02_01	0.052	3.56695
DRB1_01_02_01--DRB1_14_03_01	0.052	13.0417
DRB1_01_02_01--DRB1_14_04_01	0.065	8.45946
DRB1_01_02_01--DRB1_14_05_01	0.058	28.4545
DRB1_01_02_01--DRB1_14_06_01	0.052	1.30146
DRB1_01_02_01--DRB1_14_07_01	0.058	1252
DRB1_01_02_01--DRB1_14_08	0.058	28.4545
DRB1_01_02_01--DRB1_14_14	0.052	313
DRB1_01_02_01--DRB1_14_17	0.052	1.23593
DRB1_01_02_01--DRB1_14_21	0.052	1.43743
DRB1_01_02_01--DRB1_14_54_05	0.058	21.2203
DRB1_01_02_01--DRB1_15_01_01_01	0.025	11.1786
DRB1_01_02_01--DRB1_15_02_01_01	0.025	96.3077
DRB1_01_02_01--DRB1_15_03_01_02	0.025	9.48485
DRB1_01_02_01--DRB1_15_04	0.025	9.85827
DRB1_01_02_01--DRB1_16_01_01	0.025	30.5366
DRB1_01_02_01--DRB1_16_02_01_02	0.025	5.19502
DRB1_01_02_01--DRB1_16_03	0.032	30.5366
DRB1_01_02_01--DRB1_16_04	0.025	313
DRB1_01_02_01--DRB1_16_09_02	0.025	14.3908
DRB1_01_20_01--DRB1_03_01_08	0.058	24.56
DRB1_01_20_01--DRB1_03_02_01	0.058	175.429
DRB1_01_20_01--DRB1_03_06	0.058	35.0857
DRB1_01_20_01--DRB1_03_07	0.058	15.5443
DRB1_01_20_01--DRB1_03_15	0.058	19.8065
DRB1_01_20_01--DRB1_04_01_01	0.058	13.2043
DRB1_01_20_01--DRB1_04_02_01	0.058	614
DRB1_01_20_01--DRB1_04_03_02	0.058	111.636
DRB1_01_20_01--DRB1_04_04_01	0.058	10.7719
DRB1_01_20_01--DRB1_04_05_01	0.058	10.3193
DRB1_01_20_01--DRB1_04_06_02	0.051	111.636
DRB1_01_20_01--DRB1_04_07_01	0.058	204.667
DRB1_01_20_01--DRB1_04_08_01	0.058	18.6061
DRB1_01_20_01--DRB1_04_10_03	0.058	3.30997
DRB1_01_20_01--DRB1_04_11_01	0.058	22.7407
DRB1_01_20_01--DRB1_04_15	0.065	21.5439
DRB1_01_20_01--DRB1_04_16	0.065	13.2043
DRB1_01_20_01--DRB1_04_32	0.065	10.7719
DRB1_01_20_01--DRB1_04_92	0.058	204.667
DRB1_01_20_01--DRB1_07_01_01_02	0.065	5.2931
DRB1_01_20_01--DRB1_07_04	0.065	21.1724
DRB1_01_20_01--DRB1_08_01_01	0.052	5.84762
DRB1_01_20_01--DRB1_08_02_02	0.052	153.5
DRB1_01_20_01--DRB1_08_03_02	0.052	4.01307
DRB1_01_20_01--DRB1_08_04_01	0.052	5.53153
DRB1_01_20_01--DRB1_08_06	0.052	1.05863
DRB1_01_20_01--DRB1_08_07	0.052	76.75
DRB1_01_20_01--DRB1_08_09	0.058	153.5
DRB1_01_20_01--DRB1_08_11	0.052	68.2222
DRB1_01_20_01--DRB1_08_18	0.052	1.48309
DRB1_01_20_01--DRB1_09_01_10	0.038	11.8077
DRB1_01_20_01--DRB1_10_01_01_02	0.069	8.02614
DRB1_01_20_01--DRB1_11_01_08	0.052	5.99024
DRB1_01_20_01--DRB1_11_02_01	0.052	16.8219
DRB1_01_20_01--DRB1_11_03_01	0.052	6.78453
DRB1_01_20_01--DRB1_11_04_01	0.052	1.78229
DRB1_01_20_01--DRB1_11_05	0.052	5.0535
DRB1_01_20_01--DRB1_11_06_01	0.052	2.04326
DRB1_01_20_01--DRB1_11_08_02	0.052	2.15061
DRB1_01_20_01--DRB1_11_09	0.058	5.99024
DRB1_01_20_01--DRB1_11_11_01	0.052	122.8
DRB1_01_20_01--DRB1_11_12_01	0.052	5.99024
DRB1_01_20_01--DRB1_11_13_02	0.058	2.57442
DRB1_01_20_01--DRB1_11_14_01	0.052	68.2222
DRB1_01_20_01--DRB1_11_15	0.059	5.99024
DRB1_01_20_01--DRB1_11_19_01	0.052	6.26531
DRB1_01_20_01--DRB1_11_27_01	0.052	7.77215
DRB1_01_20_01--DRB1_11_32	0.052	15.5443
DRB1_01_20_01--DRB1_11_34	0.052	1.21224
DRB1_01_20_01--DRB1_12_01_01_02	0.072	1.33044
DRB1_01_20_01--DRB1_12_02_06	0.072	1.46017
DRB1_01_20_01--DRB1_12_06	0.065	1.33044
DRB1_01_20_01--DRB1_12_10	0.072	1.33044
DRB1_01_20_01--DRB1_13_01_13	0.052	16.8219
DRB1_01_20_01--DRB1_13_02_01	0.052	68.2222
DRB1_01_20_01--DRB1_13_03_01	0.045	3.24011
DRB1_01_20_01--DRB1_13_04	0.045	2.62393
DRB1_01_20_01--DRB1_13_05_01	0.052	5.99024
DRB1_01_20_01--DRB1_13_06	0.052	1.98065
DRB1_01_20_01--DRB1_13_10	0.052	2.62393
DRB1_01_20_01--DRB1_13_11_01	0.045	1.78229
DRB1_01_20_01--DRB1_13_12_01	0.045	2.09915
DRB1_01_20_01--DRB1_13_14_02	0.045	5.99024
DRB1_01_20_01--DRB1_13_17	0.052	8.83453
DRB1_01_20_01--DRB1_13_20	0.052	3.12468
DRB1_01_20_01--DRB1_13_26_01	0.052	13.0638
DRB1_01_20_01--DRB1_13_27	0.052	21.9286
DRB1_01_20_01--DRB1_13_36	0.052	102.333
DRB1_01_20_01--DRB1_14_01_01	0.065	20.8136
DRB1_01_20_01--DRB1_14_02_01	0.052	3.49858
DRB1_01_20_01--DRB1_14_03_01	0.052	12.7917
DRB1_01_20_01--DRB1_14_04_01	0.065	8.2973
DRB1_01_20_01--DRB1_14_05_01	0.058	27.9091
DRB1_01_20_01--DRB1_14_06_01	0.052	1.27651
DRB1_01_20_01--DRB1_14_07_01	0.058	1228
DRB1_01_20_01--DRB1_14_08	0.058	27.9091
DRB1_01_20_01--DRB1_14_14	0.052	307
DRB1_01_20_01--DRB1_14_17	0.052	1.21224
DRB1_01_20_01--DRB1_14_21	0.052	1.40987
DRB1_01_20_01--DRB1_14_54_05	0.058	20.8136
DRB1_01_20_01--DRB1_15_01_01_01	0.025	10.9643
DRB1_01_20_01--DRB1_15_02_01_01	0.025	94.4615
DRB1_01_20_01--DRB1_15_03_01_02	0.025	9.30303
DRB1_01_20_01--DRB1_15_04	0.025	9.66929
DRB1_01_20_01--DRB1_16_01_01	0.025	29.9512
DRB1_01_20_01--DRB1_16_02_01_02	0.025	5.09544
DRB1_01_20_01--DRB1_16_03	0.032	29.9512
DRB1_01_20_01--DRB1_16_04	0.025	307
DRB1_01_20_01--DRB1_16_09_02	0.025	14.1149
DRB1_03_01_08--DRB1_03_02_01	0	7.14286
DRB1_03_01_08--DRB1_03_06	0	1.42857
DRB1_03_01_08--DRB1_03_07	0	1.58
DRB1_03_01_08--DRB1_03_15	0	1.24
DRB1_03_01_08--DRB1_04_01_01	0.078	1.86
DRB1_03_01_08--DRB1_04_02_01	0.078	25
DRB1_03_01_08--DRB1_04_03_02	0.078	4.54545
DRB1_03_01_08--DRB1_04_04_01	0.078	2.28
DRB1_03_01_08--DRB1_04_05_01	0.078	2.38
DRB1_03_01_08--DRB1_04_06_02	0.077	4.54545
DRB1_03_01_08--DRB1_04_07_01	0.078	8.33333
DRB1_03_01_08--DRB1_04_08_01	0.078	1.32
DRB1_03_01_08--DRB1_04_10_03	0.078	7.42
DRB1_03_01_08--DRB1_04_11_01	0.078	1.08
DRB1_03_01_08--DRB1_04_15	0.085	1.14
DRB1_03_01_08--DRB1_04_16	0.084	1.86
DRB1_03_01_08--DRB1_04_32	0.084	2.28
DRB1_03_01_08--DRB1_04_92	0.078	8.33333
DRB1_03_01_08--DRB1_07_01_01_02	0.079	4.64
DRB1_03_01_08--DRB1_07_04	0.079	1.16
DRB1_03_01_08--DRB1_08_01_01	0.025	4.2
DRB1_03_01_08--DRB1_08_02_02	0.025	6.25
DRB1_03_01_08--DRB1_08_03_02	0.025	6.12
DRB1_03_01_08--DRB1_08_04_01	0.025	4.44
DRB1_03_01_08--DRB1_08_06	0.025	26
DRB1_03_01_08--DRB1_08_07	0.025	3.125
DRB1_03_01_08--DRB1_08_09	0.019	6.25
DRB1_03_01_08--DRB1_08_11	0.025	2.77778
DRB1_03_01_08--DRB1_08_18	0.025	16.56
DRB1_03_01_08--DRB1_09_01_10	0.071	2.08
DRB1_03_01_08--DRB1_10_01_01_02	0.078	3.06
DRB1_03_01_08--DRB1_11_01_08	0.025	4.1
DRB1_03_01_08--DRB1_11_02_01	0.025	1.46
DRB1_03_01_08--DRB1_11_03_01	0.025	3.62
DRB1_03_01_08--DRB1_11_04_01	0.025	13.78
DRB1_03_01_08--DRB1_11_05	0.025	4.86
DRB1_03_01_08--DRB1_11_06_01	0.025	12.02
DRB1_03_01_08--DRB1_11_08_02	0.025	11.42
DRB1_03_01_08--DRB1_11_09	0.012	4.1
DRB1_03_01_08--DRB1_11_11_01	0.025	5
DRB1_03_01_08--DRB1_11_12_01	0.026	4.1
DRB1_03_01_08--DRB1_11_13_02	0.019	9.54
DRB1_03_01_08--DRB1_11_14_01	0.025	2.77778
DRB1_03_01_08--DRB1_11_15	0.031	4.1
DRB1_03_01_08--DRB1_11_19_01	0.025	3.92
DRB1_03_01_08--DRB1_11_27_01	0.025	3.16
DRB1_03_01_08--DRB1_11_32	0.025	1.58
DRB1_03_01_08--DRB1_11_34	0.025	20.26
DRB1_03_01_08--DRB1_12_01_01_02	0.032	18.46
DRB1_03_01_08--DRB1_12_02_06	0.032	16.82
DRB1_03_01_08--DRB1_12_06	0.038	18.46
DRB1_03_01_08--DRB1_12_10	0.032	18.46
DRB1_03_01_08--DRB1_13_01_13	0.006	1.46
DRB1_03_01_08--DRB1_13_02_01	0.006	2.77778
DRB1_03_01_08--DRB1_13_03_01	0.019	7.58
DRB1_03_01_08--DRB1_13_04	0.019	9.36
DRB1_03_01_08--DRB1_13_05_01	0.006	4.1
DRB1_03_01_08--DRB1_13_06	0.006	12.4
DRB1_03_01_08--DRB1_13_10	0.006	9.36
DRB1_03_01_08--DRB1_13_11_01	0.019	13.78
DRB1_03_01_08--DRB1_13_12_01	0.019	11.7
DRB1_03_01_08--DRB1_13_14_02	0.019	4.1
DRB1_03_01_08--DRB1_13_17	0.025	2.78
DRB1_03_01_08--DRB1_13_20	0.006	7.86
DRB1_03_01_08--DRB1_13_26_01	0.006	1.88
DRB1_03_01_08--DRB1_13_27	0.006	1.12
DRB1_03_01_08--DRB1_13_36	0.006	4.16667
DRB1_03_01_08--DRB1_14_01_01	0.025	1.18
DRB1_03_01_08--DRB1_14_02_01	0.006	7.02
DRB1_03_01_08--DRB1_14_03_01	0.006	1.92
DRB1_03_01_08--DRB1_14_04_01	0.025	2.96
DRB1_03_01_08--DRB1_14_05_01	0.019	1.13636
DRB1_03_01_08--DRB1_14_06_01	0.006	19.24
DRB1_03_01_08--DRB1_14_07_01	0.019	50
DRB1_03_01_08--DRB1_14_08	0.019	1.13636
DRB1_03_01_08--DRB1_14_14	0.013	12.5
DRB1_03_01_08--DRB1_14_17	0.006	20.26
DRB1_03_01_08--DRB1_14_21	0.006	17.42
DRB1_03_01_08--DRB1_14_54_05	0.019	1.18
DRB1_03_01_08--DRB1_15_01_01_01	0.064	2.24
DRB1_03_01_08--DRB1_15_02_01_01	0.064	3.84615
DRB1_03_01_08--DRB1_15_03_01_02	0.064	2.64
DRB1_03_01_08--DRB1_15_04	0.064	2.54
DRB1_03_01_08--DRB1_16_01_01	0.064	1.21951
DRB1_03_01_08--DRB1_16_02_01_02	0.064	4.82
DRB1_03_01_08--DRB1_16_03	0.071	1.21951
DRB1_03_01_08--DRB1_16_04	0.064	12.5
DRB1_03_01_08--DRB1_16_09_02	0.064	1.74
DRB1_03_02_01--DRB1_03_06	0	5
DRB1_03_02_01--DRB1_03_07	0	11.2857
DRB1_03_02_01--DRB1_03_15	0	8.85714
DRB1_03_02_01--DRB1_04_01_01	0.078	13.2857
DRB1_03_02_01--DRB1_04_02_01	0.078	3.5
DRB1_03_02_01--DRB1_04_03_02	0.078	1.57143
DRB1_03_02_01--DRB1_04_04_01	0.078	16.2857
DRB1_03_02_01--DRB1_04_05_01	0.078	17
DRB1_03_02_01--DRB1_04_06_02	0.077	1.57143
DRB1_03_02_01--DRB1_04_07_01	0.078	1.16667
DRB1_03_02_01--DRB1_04_08_01	0.078	9.42857
DRB1_03_02_01--DRB1_04_10_03	0.078	53
DRB1_03_02_01--DRB1_04_11_01	0.078	7.71429
DRB1_03_02_01--DRB1_04_15	0.085	8.14286
DRB1_03_02_01--DRB1_04_16	0.084	13.2857
DRB1_03_02_01--DRB1_04_32	0.084	16.2857
DRB1_03_02_01--DRB1_04_92	0.078	1.16667
DRB1_03_02_01--DRB1_07_01_01_02	0.079	33.1429
DRB1_03_02_01--DRB1_07_04	0.079	8.28571
DRB1_03_02_01--DRB1_08_01_01	0.025	30
DRB1_03_02_01--DRB1_08_02_02	0.025	1.14286
DRB1_03_02_01--DRB1_08_03_02	0.025	43.7143
DRB1_03_02_01--DRB1_08_04_01	0.025	31.7143
DRB1_03_02_01--DRB1_08_06	0.025	185.714
DRB1_03_02_01--DRB1_08_07	0.025	2.28571
DRB1_03_02_01--DRB1_08_09	0.019	1.14286
DRB1_03_02_01--DRB1_08_11	0.025	2.57143
DRB1_03_02_01--DRB1_08_18	0.025	118.286
DRB1_03_02_01--DRB1_09_01_10	0.071	14.8571
DRB1_03_02_01--DRB1_10_01_01_02	0.078	21.8571
DRB1_03_02_01--DRB1_11_01_08	0.025	29.2857
DRB1_03_02_01--DRB1_11_02_01	0.025	10.4286
DRB1_03_02_01--DRB1_11_03_01	0.025	25.8571
DRB1_03_02_01--DRB1_11_04_01	0.025	98.4286
DRB1_03_02_01--DRB1_11_05	0.025	34.7143
DRB1_03_02_01--DRB1_11_06_01	0.025	85.8571
DRB1_03_02_01--DRB1_11_08_02	0.025	81.5714
DRB1_03_02_01--DRB1_11_09	0.012	29.2857
DRB1_03_02_01--DRB1_11_11_01	0.025	1.42857
DRB1_03_02_01--DRB1_11_12_01	0.026	29.2857
DRB1_03_02_01--DRB1_11_13_02	0.019	68.1429
DRB1_03_02_01--DRB1_11_14_01	0.025	2.57143
DRB1_03_02_01--DRB1_11_15	0.031	29.2857
DRB1_03_02_01--DRB1_11_19_01	0.025	28
DRB1_03_02_01--DRB1_11_27_01	0.025	22.5714
DRB1_03_02_01--DRB1_11_32	0.025	11.2857
DRB1_03_02_01--DRB1_11_34	0.025	144.714
DRB1_03_02_01--DRB1_12_01_01_02	0.032	131.857
DRB1_03_02_01--DRB1_12_02_06	0.032	120.143
DRB1_03_02_01--DRB1_12_06	0.038	131.857
DRB1_03_02_01--DRB1_12_10	0.032	131.857
DRB1_03_02_01--DRB1_13_01_13	0.006	10.4286
DRB1_03_02_01--DRB1_13_02_01	0.006	2.57143
DRB1_03_02_01--DRB1_13_03_01	0.019	54.1429
DRB1_03_02_01--DRB1_13_04	0.019	66.8571
DRB1_03_02_01--DRB1_13_05_01	0.006	29.2857
DRB1_03_02_01--DRB1_13_06	0.006	88.5714
DRB1_03_02_01--DRB1_13_10	0.006	66.8571
DRB1_03_02_01--DRB1_13_11_01	0.019	98.4286
DRB1_03_02_01--DRB1_13_12_01	0.019	83.5714
DRB1_03_02_01--DRB1_13_14_02	0.019	29.2857
DRB1_03_02_01--DRB1_13_17	0.025	19.8571
DRB1_03_02_01--DRB1_13_20	0.006	56.1429
DRB1_03_02_01--DRB1_13_26_01	0.006	13.4286
DRB1_03_02_01--DRB1_13_27	0.006	8
DRB1_03_02_01--DRB1_13_36	0.006	1.71429
DRB1_03_02_01--DRB1_14_01_01	0.025	8.42857
DRB1_03_02_01--DRB1_14_02_01	0.006	50.1429
DRB1_03_02_01--DRB1_14_03_01	0.006	13.7143
DRB1_03_02_01--DRB1_14_04_01	0.025	21.1429
DRB1_03_02_01--DRB1_14_05_01	0.019	6.28571
DRB1_03_02_01--DRB1_14_06_01	0.006	137.429
DRB1_03_02_01--DRB1_14_07_01	0.019	7
DRB1_03_02_01--DRB1_14_08	0.019	6.28571
DRB1_03_02_01--DRB1_14_14	0.013	1.75
DRB1_03_02_01--DRB1_14_17	0.006	144.714
DRB1_03_02_01--DRB1_14_21	0.006	124.429
DRB1_03_02_01--DRB1_14_54_05	0.019	8.42857
DRB1_03_02_01--DRB1_15_01_01_01	0.064	16
DRB1_03_02_01--DRB1_15_02_01_01	0.064	1.85714
DRB1_03_02_01--DRB1_15_03_01_02	0.064	18.8571
DRB1_03_02_01--DRB1_15_04	0.064	18.1429
DRB1_03_02_01--DRB1_16_01_01	0.064	5.85714
DRB1_03_02_01--DRB1_16_02_01_02	0.064	34.4286
DRB1_03_02_01--DRB1_16_03	0.071	5.85714
DRB1_03_02_01--DRB1_16_04	0.064	1.75
DRB1_03_02_01--DRB1_16_09_02	0.064	12.4286
DRB1_03_06--DRB1_03_07	0	2.25714
DRB1_03_06--DRB1_03_15	0	1.77143
DRB1_03_06--DRB1_04_01_01	0.078	2.65714
DRB1_03_06--DRB1_04_02_01	0.078	17.5
DRB1_03_06--DRB1_04_03_02	0.078	3.18182
DRB1_03_06--DRB1_04_04_01	0.078	3.25714
DRB1_03_06--DRB1_04_05_01	0.078	3.4
DRB1_03_06--DRB1_04_06_02	0.077	3.18182
DRB1_03_06--DRB1_04_07_01	0.078	5.83333
DRB1_03_06--DRB1_04_08_01	0.078	1.88571
DRB1_03_06--DRB1_04_10_03	0.078	10.6
DRB1_03_06--DRB1_04_11_01	0.078	1.54286
DRB1_03_06--DRB1_04_15	0.085	1.62857
DRB1_03_06--DRB1_04_16	0.084	2.65714
DRB1_03_06--DRB1_04_32	0.084	3.25714
DRB1_03_06--DRB1_04_92	0.078	5.83333
DRB1_03_06--DRB1_07_01_01_02	0.079	6.62857
DRB1_03_06--DRB1_07_04	0.079	1.65714
DRB1_03_06--DRB1_08_01_01	0.025	6
DRB1_03_06--DRB1_08_02_02	0.025	4.375
DRB1_03_06--DRB1_08_03_02	0.025	8.74286
DRB1_03_06--DRB1_08_04_01	0.025	6.34286
DRB1_03_06--DRB1_08_06	0.025	37.1429
DRB1_03_06--DRB1_08_07	0.025	2.1875
DRB1_03_06--DRB1_08_09	0.019	4.375
DRB1_03_06--DRB1_08_11	0.025	1.94444
DRB1_03_06--DRB1_08_18	0.025	23.6571
DRB1_03_06--DRB1_09_01_10	0.071	2.97143
DRB1_03_06--DRB1_10_01_01_02	0.078	4.37143
DRB1_03_06--DRB1_11_01_08	0.025	5.85714
DRB1_03_06--DRB1_11_02_01	0.025	2.08571
DRB1_03_06--DRB1_11_03_01	0.025	5.17143
DRB1_03_06--DRB1_11_04_01	0.025	19.6857
DRB1_03_06--DRB1_11_05	0.025	6.94286
DRB1_03_06--DRB1_11_06_01	0.025	17.1714
DRB1_03_06--DRB1_11_08_02	0.025	16.3143
DRB1_03_06--DRB1_11_09	0.012	5.85714
DRB1_03_06--DRB1_11_11_01	0.025	3.5
DRB1_03_06--DRB1_11_12_01	0.026	5.85714
DRB1_03_06--DRB1_11_13_02	0.019	13.6286
DRB1_03_06--DRB1_11_14_01	0.025	1.94444
DRB1_03_06--DRB1_11_15	0.031	5.85714
DRB1_03_06--DRB1_11_19_01	0.025	5.6
DRB1_03_06--DRB1_11_27_01	0.025	4.51429
DRB1_03_06--DRB1_11_32	0.025	2.25714
DRB1_03_06--DRB1_11_34	0.025	28.9429
DRB1_03_06--DRB1_12_01_01_02	0.032	26.3714
DRB1_03_06--DRB1_12_02_06	0.032	24.0286
DRB1_03_06--DRB1_12_06	0.038	26.3714
DRB1_03_06--DRB1_12_10	0.032	26.3714
DRB1_03_06--DRB1_13_01_13	0.006	2.08571
DRB1_03_06--DRB1_13_02_01	0.006	1.94444
DRB1_03_06--DRB1_13_03_01	0.019	10.8286
DRB1_03_06--DRB1_13_04	0.019	13.3714
DRB1_03_06--DRB1_13_05_01	0.006	5.85714
DRB1_03_06--DRB1_13_06	0.006	17.7143
DRB1_03_06--DRB1_13_10	0.006	13.3714
DRB1_03_06--DRB1_13_11_01	0.019	19.6857
DRB1_03_06--DRB1_13_12_01	0.019	16.7143
DRB1_03_06--DRB1_13_14_02	0.019	5.85714
DRB1_03_06--DRB1_13_17	0.025	3.97143
DRB1_03_06--DRB1_13_20	0.006	11.2286
DRB1_03_06--DRB1_13_26_01	0.006	2.68571
DRB1_03_06--DRB1_13_27	0.006	1.6
DRB1_03_06--DRB1_13_36	0.006	2.91667
DRB1_03_06--DRB1_14_01_01	0.025	1.68571
DRB1_03_06--DRB1_14_02_01	0.006	10.0286
DRB1_03_06--DRB1_14_03_01	0.006	2.74286
DRB1_03_06--DRB1_14_04_01	0.025	4.22857
DRB1_03_06--DRB1_14_05_01	0.019	1.25714
DRB1_03_06--DRB1_14_06_01	0.006	27.4857
DRB1_03_06--DRB1_14_07_01	0.019	35
DRB1_03_06--DRB1_14_08	0.019	1.25714
DRB1_03_06--DRB1_14_14	0.013	8.75
DRB1_03_06--DRB1_14_17	0.006	28.9429
DRB1_03_06--DRB1_14_21	0.006	24.8857
DRB1_03_06--DRB1_14_54_05	0.019	1.68571
DRB1_03_06--DRB1_15_01_01_01	0.064	3.2
DRB1_03_06--DRB1_15_02_01_01	0.064	2.69231
DRB1_03_06--DRB1_15_03_01_02	0.064	3.77143
DRB1_03_06--DRB1_15_04	0.064	3.62857
DRB1_03_06--DRB1_16_01_01	0.064	1.17143
DRB1_03_06--DRB1_16_02_01_02	0.064	6.88571
DRB1_03_06--DRB1_16_03	0.071	1.17143
DRB1_03_06--DRB1_16_04	0.064	8.75
DRB1_03_06--DRB1_16_09_02	0.064	2.48571
DRB1_03_07--DRB1_03_15	0	1.27419
DRB1_03_07--DRB1_04_01_01	0.078	1.17722
DRB1_03_07--DRB1_04_02_01	0.078	39.5
DRB1_03_07--DRB1_04_03_02	0.078	7.18182
DRB1_03_07--DRB1_04_04_01	0.078	1.44304
DRB1_03_07--DRB1_04_05_01	0.078	1.50633
DRB1_03_07--DRB1_04_06_02	0.077	7.18182
DRB1_03_07--DRB1_04_07_01	0.078	13.1667
DRB1_03_07--DRB1_04_08_01	0.078	1.19697
DRB1_03_07--DRB1_04_10_03	0.078	4.6962
DRB1_03_07--DRB1_04_11_01	0.078	1.46296
DRB1_03_07--DRB1_04_15	0.085	1.38596
DRB1_03_07--DRB1_04_16	0.084	1.17722
DRB1_03_07--DRB1_04_32	0.084	1.44304
DRB1_03_07--DRB1_04_92	0.078	13.1667
DRB1_03_07--DRB1_07_01_01_02	0.079	2.93671
DRB1_03_07--DRB1_07_04	0.079	1.36207
DRB1_03_07--DRB1_08_01_01	0.025	2.65823
DRB1_03_07--DRB1_08_02_02	0.025	9.875
DRB1_03_07--DRB1_08_03_02	0.025	3.87342
DRB1_03_07--DRB1_08_04_01	0.025	2.81013
DRB1_03_07--DRB1_08_06	0.025	16.4557
DRB1_03_07--DRB1_08_07	0.025	4.9375
DRB1_03_07--DRB1_08_09	0.019	9.875
DRB1_03_07--DRB1_08_11	0.025	4.38889
DRB1_03_07--DRB1_08_18	0.025	10.481
DRB1_03_07--DRB1_09_01_10	0.071	1.31646
DRB1_03_07--DRB1_10_01_01_02	0.078	1.93671
DRB1_03_07--DRB1_11_01_08	0.025	2.59494
DRB1_03_07--DRB1_11_02_01	0.025	1.08219
DRB1_03_07--DRB1_11_03_01	0.025	2.29114
DRB1_03_07--DRB1_11_04_01	0.025	8.72152
DRB1_03_07--DRB1_11_05	0.025	3.07595
DRB1_03_07--DRB1_11_06_01	0.025	7.60759
DRB1_03_07--DRB1_11_08_02	0.025	7.22785
DRB1_03_07--DRB1_11_09	0.012	2.59494
DRB1_03_07--DRB1_11_11_01	0.025	7.9
DRB1_03_07--DRB1_11_12_01	0.026	2.59494
DRB1_03_07--DRB1_11_13_02	0.019	6.03797
DRB1_03_07--DRB1_11_14_01	0.025	4.38889
DRB1_03_07--DRB1_11_15	0.031	2.59494
DRB1_03_07--DRB1_11_19_01	0.025	2.48101
DRB1_03_07--DRB1_11_27_01	0.025	2
DRB1_03_07--DRB1_11_32	0.025	1
DRB1_03_07--DRB1_11_34	0.025	12.8228
DRB1_03_07--DRB1_12_01_01_02	0.032	11.6835
DRB1_03_07--DRB1_12_02_06	0.032	10.6456
DRB1_03_07--DRB1_12_06	0.038	11.6835
DRB1_03_07--DRB1_12_10	0.032	11.6835
DRB1_03_07--DRB1_13_01_13	0.006	1.08219
DRB1_03_07--DRB1_13_02_01	0.006	4.38889
DRB1_03_07--DRB1_13_03_01	0.019	4.79747
DRB1_03_07--DRB1_13_04	0.019	5.92405
DRB1_03_07--DRB1_13_05_01	0.006	2.59494
DRB1_03_07--DRB1_13_06	0.006	7.8481
DRB1_03_07--DRB1_13_10	0.006	5.92405
DRB1_03_07--DRB1_13_11_01	0.019	8.72152
DRB1_03_07--DRB1_13_12_01	0.019	7.40506
DRB1_03_07--DRB1_13_14_02	0.019	2.59494
DRB1_03_07--DRB1_13_17	0.025	1.75949
DRB1_03_07--DRB1_13_20	0.006	4.97468
DRB1_03_07--DRB1_13_26_01	0.006	1.18987
DRB1_03_07--DRB1_13_27	0.006	1.41071
DRB1_03_07--DRB1_13_36	0.006	6.58333
DRB1_03_07--DRB1_14_01_01	0.025	1.33898
DRB1_03_07--DRB1_14_02_01	0.006	4.44304
DRB1_03_07--DRB1_14_03_01	0.006	1.21519
DRB1_03_07--DRB1_14_04_01	0.025	1.87342
DRB1_03_07--DRB1_14_05_01	0.019	1.79545
DRB1_03_07--DRB1_14_06_01	0.006	12.1772
DRB1_03_07--DRB1_14_07_01	0.019	79
DRB1_03_07--DRB1_14_08	0.019	1.79545
DRB1_03_07--DRB1_14_14	0.013	19.75
DRB1_03_07--DRB1_14_17	0.006	12.8228
DRB1_03_07--DRB1_14_21	0.006	11.0253
DRB1_03_07--DRB1_14_54_05	0.019	1.33898
DRB1_03_07--DRB1_15_01_01_01	0.064	1.41772
DRB1_03_07--DRB1_15_02_01_01	0.064	6.07692
DRB1_03_07--DRB1_15_03_01_02	0.064	1.67089
DRB1_03_07--DRB1_15_04	0.064	1.60759
DRB1_03_07--DRB1_16_01_01	0.064	1.92683
DRB1_03_07--DRB1_16_02_01_02	0.064	3.05063
DRB1_03_07--DRB1_16_03	0.071	1.92683
DRB1_03_07--DRB1_16_04	0.064	19.75
DRB1_03_07--DRB1_16_09_02	0.064	1.10127
DRB1_03_15--DRB1_04_01_01	0.078	1.5
DRB1_03_15--DRB1_04_02_01	0.078	31
DRB1_03_15--DRB1_04_03_02	0.078	5.63636
DRB1_03_15--DRB1_04_04_01	0.078	1.83871
DRB1_03_15--DRB1_04_05_01	0.078	1.91935
DRB1_03_15--DRB1_04_06_02	0.077	5.63636
DRB1_03_15--DRB1_04_07_01	0.078	10.3333
DRB1_03_15--DRB1_04_08_01	0.078	1.06452
DRB1_03_15--DRB1_04_10_03	0.078	5.98387
DRB1_03_15--DRB1_04_11_01	0.078	1.14815
DRB1_03_15--DRB1_04_15	0.085	1.08772
DRB1_03_15--DRB1_04_16	0.084	1.5
DRB1_03_15--DRB1_04_32	0.084	1.83871
DRB1_03_15--DRB1_04_92	0.078	10.3333
DRB1_03_15--DRB1_07_01_01_02	0.079	3.74194
DRB1_03_15--DRB1_07_04	0.079	1.06897
DRB1_03_15--DRB1_08_01_01	0.025	3.3871
DRB1_03_15--DRB1_08_02_02	0.025	7.75
DRB1_03_15--DRB1_08_03_02	0.025	4.93548
DRB1_03_15--DRB1_08_04_01	0.025	3.58065
DRB1_03_15--DRB1_08_06	0.025	20.9677
DRB1_03_15--DRB1_08_07	0.025	3.875
DRB1_03_15--DRB1_08_09	0.019	7.75
DRB1_03_15--DRB1_08_11	0.025	3.44444
DRB1_03_15--DRB1_08_18	0.025	13.3548
DRB1_03_15--DRB1_09_01_10	0.071	1.67742
DRB1_03_15--DRB1_10_01_01_02	0.078	2.46774
DRB1_03_15--DRB1_11_01_08	0.025	3.30645
DRB1_03_15--DRB1_11_02_01	0.025	1.17742
DRB1_03_15--DRB1_11_03_01	0.025	2.91935
DRB1_03_15--DRB1_11_04_01	0.025	11.1129
DRB1_03_15--DRB1_11_05	0.025	3.91935
DRB1_03_15--DRB1_11_06_01	0.025	9.69355
DRB1_03_15--DRB1_11_08_02	0.025	9.20968
DRB1_03_15--DRB1_11_09	0.012	3.30645
DRB1_03_15--DRB1_11_11_01	0.025	6.2
DRB1_03_15--DRB1_11_12_01	0.026	3.30645
DRB1_03_15--DRB1_11_13_02	0.019	7.69355
DRB1_03_15--DRB1_11_14_01	0.025	3.44444
DRB1_03_15--DRB1_11_15	0.031	3.30645
DRB1_03_15--DRB1_11_19_01	0.025	3.16129
DRB1_03_15--DRB1_11_27_01	0.025	2.54839
DRB1_03_15--DRB1_11_32	0.025	1.27419
DRB1_03_15--DRB1_11_34	0.025	16.3387
DRB1_03_15--DRB1_12_01_01_02	0.032	14.8871
DRB1_03_15--DRB1_12_02_06	0.032	13.5645
DRB1_03_15--DRB1_12_06	0.038	14.8871
DRB1_03_15--DRB1_12_10	0.032	14.8871
DRB1_03_15--DRB1_13_01_13	0.006	1.17742
DRB1_03_15--DRB1_13_02_01	0.006	3.44444
DRB1_03_15--DRB1_13_03_01	0.019	6.1129
DRB1_03_15--DRB1_13_04	0.019	7.54839
DRB1_03_15--DRB1_13_05_01	0.006	3.30645
DRB1_03_15--DRB1_13_06	0.006	10
DRB1_03_15--DRB1_13_10	0.006	7.54839
DRB1_03_15--DRB1_13_11_01	0.019	11.1129
DRB1_03_15--DRB1_13_12_01	0.019	9.43548
DRB1_03_15--DRB1_13_14_02	0.019	3.30645
DRB1_03_15--DRB1_13_17	0.025	2.24194
DRB1_03_15--DRB1_13_20	0.006	6.33871
DRB1_03_15--DRB1_13_26_01	0.006	1.51613
DRB1_03_15--DRB1_13_27	0.006	1.10714
DRB1_03_15--DRB1_13_36	0.006	5.16667
DRB1_03_15--DRB1_14_01_01	0.025	1.05085
DRB1_03_15--DRB1_14_02_01	0.006	5.66129
DRB1_03_15--DRB1_14_03_01	0.006	1.54839
DRB1_03_15--DRB1_14_04_01	0.025	2.3871
DRB1_03_15--DRB1_14_05_01	0.019	1.40909
DRB1_03_15--DRB1_14_06_01	0.006	15.5161
DRB1_03_15--DRB1_14_07_01	0.019	62
DRB1_03_15--DRB1_14_08	0.019	1.40909
DRB1_03_15--DRB1_14_14	0.013	15.5
DRB1_03_15--DRB1_14_17	0.006	16.3387
DRB1_03_15--DRB1_14_21	0.006	14.0484
DRB1_03_15--DRB1_14_54_05	0.019	1.05085
DRB1_03_15--DRB1_15_01_01_01	0.064	1.80645
DRB1_03_15--DRB1_15_02_01_01	0.064	4.76923
DRB1_03_15--DRB1_15_03_01_02	0.064	2.12903
DRB1_03_15--DRB1_15_04	0.064	2.04839
DRB1_03_15--DRB1_16_01_01	0.064	1.5122
DRB1_03_15--DRB1_16_02_01_02	0.064	3.8871
DRB1_03_15--DRB1_16_03	0.071	1.5122
DRB1_03_15--DRB1_16_04	0.064	15.5
DRB1_03_15--DRB1_16_09_02	0.064	1.40323
DRB1_04_01_01--DRB1_04_02_01	0	46.5
DRB1_04_01_01--DRB1_04_03_02	0	8.45455
DRB1_04_01_01--DRB1_04_04_01	0	1.22581
DRB1_04_01_01--DRB1_04_05_01	0	1.27957
DRB1_04_01_01--DRB1_04_06_02	0.006	8.45455
DRB1_04_01_01--DRB1_04_07_01	0	15.5
DRB1_04_01_01--DRB1_04_08_01	0	1.40909
DRB1_04_01_01--DRB1_04_10_03	0	3.98925
DRB1_04_01_01--DRB1_04_11_01	0	1.72222
DRB1_04_01_01--DRB1_04_15	0.006	1.63158
DRB1_04_01_01--DRB1_04_16	0.006	1
DRB1_04_01_01--DRB1_04_32	0.006	1.22581
DRB1_04_01_01--DRB1_04_92	0	15.5
DRB1_04_01_01--DRB1_07_01_01_02	0.071	2.49462
DRB1_04_01_01--DRB1_07_04	0.071	1.60345
DRB1_04_01_01--DRB1_08_01_01	0.064	2.25806
DRB1_04_01_01--DRB1_08_02_02	0.064	11.625
DRB1_04_01_01--DRB1_08_03_02	0.064	3.29032
DRB1_04_01_01--DRB1_08_04_01	0.064	2.3871
DRB1_04_01_01--DRB1_08_06	0.064	13.9785
DRB1_04_01_01--DRB1_08_07	0.064	5.8125
DRB1_04_01_01--DRB1_08_09	0.077	11.625
DRB1_04_01_01--DRB1_08_11	0.064	5.16667
DRB1_04_01_01--DRB1_08_18	0.064	8.90323
DRB1_04_01_01--DRB1_09_01_10	0.057	1.11828
DRB1_04_01_01--DRB1_10_01_01_02	0.078	1.64516
DRB1_04_01_01--DRB1_11_01_08	0.065	2.2043
DRB1_04_01_01--DRB1_11_02_01	0.065	1.27397
DRB1_04_01_01--DRB1_11_03_01	0.065	1.94624
DRB1_04_01_01--DRB1_11_04_01	0.065	7.4086
DRB1_04_01_01--DRB1_11_05	0.065	2.6129
DRB1_04_01_01--DRB1_11_06_01	0.065	6.46237
DRB1_04_01_01--DRB1_11_08_02	0.065	6.13978
DRB1_04_01_01--DRB1_11_09	0.078	2.2043
DRB1_04_01_01--DRB1_11_11_01	0.065	9.3
DRB1_04_01_01--DRB1_11_12_01	0.071	2.2043
DRB1_04_01_01--DRB1_11_13_02	0.078	5.12903
DRB1_04_01_01--DRB1_11_14_01	0.065	5.16667
DRB1_04_01_01--DRB1_11_15	0.078	2.2043
DRB1_04_01_01--DRB1_11_19_01	0.065	2.10753
DRB1_04_01_01--DRB1_11_27_01	0.065	1.69892
DRB1_04_01_01--DRB1_11_32	0.065	1.17722
DRB1_04_01_01--DRB1_11_34	0.065	10.8925
DRB1_04_01_01--DRB1_12_01_01_02	0.092	9.92473
DRB1_04_01_01--DRB1_12_02_06	0.092	9.04301
DRB1_04_01_01--DRB1_12_06	0.085	9.92473
DRB1_04_01_01--DRB1_12_10	0.092	9.92473
DRB1_04_01_01--DRB1_13_01_13	0.071	1.27397
DRB1_04_01_01--DRB1_13_02_01	0.071	5.16667
DRB1_04_01_01--DRB1_13_03_01	0.058	4.07527
DRB1_04_01_01--DRB1_13_04	0.058	5.03226
DRB1_04_01_01--DRB1_13_05_01	0.071	2.2043
DRB1_04_01_01--DRB1_13_06	0.071	6.66667
DRB1_04_01_01--DRB1_13_10	0.071	5.03226
DRB1_04_01_01--DRB1_13_11_01	0.058	7.4086
DRB1_04_01_01--DRB1_13_12_01	0.058	6.29032
DRB1_04_01_01--DRB1_13_14_02	0.058	2.2043
DRB1_04_01_01--DRB1_13_17	0.064	1.49462
DRB1_04_01_01--DRB1_13_20	0.071	4.22581
DRB1_04_01_01--DRB1_13_26_01	0.071	1.01075
DRB1_04_01_01--DRB1_13_27	0.071	1.66071
DRB1_04_01_01--DRB1_13_36	0.071	7.75
DRB1_04_01_01--DRB1_14_01_01	0.084	1.57627
DRB1_04_01_01--DRB1_14_02_01	0.071	3.77419
DRB1_04_01_01--DRB1_14_03_01	0.071	1.03226
DRB1_04_01_01--DRB1_14_04_01	0.084	1.5914
DRB1_04_01_01--DRB1_14_05_01	0.077	2.11364
DRB1_04_01_01--DRB1_14_06_01	0.071	10.3441
DRB1_04_01_01--DRB1_14_07_01	0.077	93
DRB1_04_01_01--DRB1_14_08	0.077	2.11364
DRB1_04_01_01--DRB1_14_14	0.071	23.25
DRB1_04_01_01--DRB1_14_17	0.071	10.8925
DRB1_04_01_01--DRB1_14_21	0.071	9.36559
DRB1_04_01_01--DRB1_14_54_05	0.077	1.57627
DRB1_04_01_01--DRB1_15_01_01_01	0.065	1.2043
DRB1_04_01_01--DRB1_15_02_01_01	0.065	7.15385
DRB1_04_01_01--DRB1_15_03_01_02	0.065	1.41935
DRB1_04_01_01--DRB1_15_04	0.065	1.36559
DRB1_04_01_01--DRB1_16_01_01	0.065	2.26829
DRB1_04_01_01--DRB1_16_02_01_02	0.065	2.5914
DRB1_04_01_01--DRB1_16_03	0.072	2.26829
DRB1_04_01_01--DRB1_16_04	0.065	23.25
DRB1_04_01_01--DRB1_16_09_02	0.065	1.06897
DRB1_04_02_01--DRB1_04_03_02	0	5.5
DRB1_04_02_01--DRB1_04_04_01	0	57
DRB1_04_02_01--DRB1_04_05_01	0	59.5
DRB1_04_02_01--DRB1_04_06_02	0.006	5.5
DRB1_04_02_01--DRB1_04_07_01	0	3
DRB1_04_02_01--DRB1_04_08_01	0	33
DRB1_04_02_01--DRB1_04_10_03	0	185.5
DRB1_04_02_01--DRB1_04_11_01	0	27
DRB1_04_02_01--DRB1_04_15	0.006	28.5
DRB1_04_02_01--DRB1_04_16	0.006	46.5
DRB1_04_02_01--DRB1_04_32	0.006	57
DRB1_04_02_01--DRB1_04_92	0	3
DRB1_04_02_01--DRB1_07_01_01_02	0.071	116
DRB1_04_02_01--DRB1_07_04	0.071	29
DRB1_04_02_01--DRB1_08_01_01	0.064	105
DRB1_04_02_01--DRB1_08_02_02	0.064	4
DRB1_04_02_01--DRB1_08_03_02	0.064	153
DRB1_04_02_01--DRB1_08_04_01	0.064	111
DRB1_04_02_01--DRB1_08_06	0.064	650
DRB1_04_02_01--DRB1_08_07	0.064	8
DRB1_04_02_01--DRB1_08_09	0.077	4
DRB1_04_02_01--DRB1_08_11	0.064	9
DRB1_04_02_01--DRB1_08_18	0.064	414
DRB1_04_02_01--DRB1_09_01_10	0.057	52
DRB1_04_02_01--DRB1_10_01_01_02	0.078	76.5
DRB1_04_02_01--DRB1_11_01_08	0.065	102.5
DRB1_04_02_01--DRB1_11_02_01	0.065	36.5
DRB1_04_02_01--DRB1_11_03_01	0.065	90.5
DRB1_04_02_01--DRB1_11_04_01	0.065	344.5
DRB1_04_02_01--DRB1_11_05	0.065	121.5
DRB1_04_02_01--DRB1_11_06_01	0.065	300.5
DRB1_04_02_01--DRB1_11_08_02	0.065	285.5
DRB1_04_02_01--DRB1_11_09	0.078	102.5
DRB1_04_02_01--DRB1_11_11_01	0.065	5
DRB1_04_02_01--DRB1_11_12_01	0.071	102.5
DRB1_04_02_01--DRB1_11_13_02	0.078	238.5
DRB1_04_02_01--DRB1_11_14_01	0.065	9
DRB1_04_02_01--DRB1_11_15	0.078	102.5
DRB1_04_02_01--DRB1_11_19_01	0.065	98
DRB1_04_02_01--DRB1_11_27_01	0.065	79
DRB1_04_02_01--DRB1_11_32	0.065	39.5
DRB1_04_02_01--DRB1_11_34	0.065	506.5
DRB1_04_02_01--DRB1_12_01_01_02	0.092	461.5
DRB1_04_02_01--DRB1_12_02_06	0.092	420.5
DRB1_04_02_01--DRB1_12_06	0.085	461.5
DRB1_04_02_01--DRB1_12_10	0.092	461.5
DRB1_04_02_01--DRB1_13_01_13	0.071	36.5
DRB1_04_02_01--DRB1_13_02_01	0.071	9
DRB1_04_02_01--DRB1_13_03_01	0.058	189.5
DRB1_04_02_01--DRB1_13_04	0.058	234
DRB1_04_02_01--DRB1_13_05_01	0.071	102.5
DRB1_04_02_01--DRB1_13_06	0.071	310
DRB1_04_02_01--DRB1_13_10	0.071	234
DRB1_04_02_01--DRB1_13_11_01	0.058	344.5
DRB1_04_02_01--DRB1_13_12_01	0.058	292.5
DRB1_04_02_01--DRB1_13_14_02	0.058	102.5
DRB1_04_02_01--DRB1_13_17	0.064	69.5
DRB1_04_02_01--DRB1_13_20	0.071	196.5
DRB1_04_02_01--DRB1_13_26_01	0.071	47
DRB1_04_02_01--DRB1_13_27	0.071	28
DRB1_04_02_01--DRB1_13_36	0.071	6
DRB1_04_02_01--DRB1_14_01_01	0.084	29.5
DRB1_04_02_01--DRB1_14_02_01	0.071	175.5
DRB1_04_02_01--DRB1_14_03_01	0.071	48
DRB1_04_02_01--DRB1_14_04_01	0.084	74
DRB1_04_02_01--DRB1_14_05_01	0.077	22
DRB1_04_02_01--DRB1_14_06_01	0.071	481
DRB1_04_02_01--DRB1_14_07_01	0.077	2
DRB1_04_02_01--DRB1_14_08	0.077	22
DRB1_04_02_01--DRB1_14_14	0.071	2
DRB1_04_02_01--DRB1_14_17	0.071	506.5
DRB1_04_02_01--DRB1_14_21	0.071	435.5
DRB1_04_02_01--DRB1_14_54_05	0.077	29.5
DRB1_04_02_01--DRB1_15_01_01_01	0.065	56
DRB1_04_02_01--DRB1_15_02_01_01	0.065	6.5
DRB1_04_02_01--DRB1_15_03_01_02	0.065	66
DRB1_04_02_01--DRB1_15_04	0.065	63.5
DRB1_04_02_01--DRB1_16_01_01	0.065	20.5
DRB1_04_02_01--DRB1_16_02_01_02	0.065	120.5
DRB1_04_02_01--DRB1_16_03	0.072	20.5
DRB1_04_02_01--DRB1_16_04	0.065	2
DRB1_04_02_01--DRB1_16_09_02	0.065	43.5
DRB1_04_03_02--DRB1_04_04_01	0	10.3636
DRB1_04_03_02--DRB1_04_05_01	0	10.8182
DRB1_04_03_02--DRB1_04_06_02	0.006	1
DRB1_04_03_02--DRB1_04_07_01	0	1.83333
DRB1_04_03_02--DRB1_04_08_01	0	6
DRB1_04_03_02--DRB1_04_10_03	0	33.7273
DRB1_04_03_02--DRB1_04_11_01	0	4.90909
DRB1_04_03_02--DRB1_04_15	0.006	5.18182
DRB1_04_03_02--DRB1_04_16	0.006	8.45455
DRB1_04_03_02--DRB1_04_32	0.006	10.3636
DRB1_04_03_02--DRB1_04_92	0	1.83333
DRB1_04_03_02--DRB1_07_01_01_02	0.071	21.0909
DRB1_04_03_02--DRB1_07_04	0.071	5.27273
DRB1_04_03_02--DRB1_08_01_01	0.064	19.0909
DRB1_04_03_02--DRB1_08_02_02	0.064	1.375
DRB1_04_03_02--DRB1_08_03_02	0.064	27.8182
DRB1_04_03_02--DRB1_08_04_01	0.064	20.1818
DRB1_04_03_02--DRB1_08_06	0.064	118.182
DRB1_04_03_02--DRB1_08_07	0.064	1.45455
DRB1_04_03_02--DRB1_08_09	0.077	1.375
DRB1_04_03_02--DRB1_08_11	0.064	1.63636
DRB1_04_03_02--DRB1_08_18	0.064	75.2727
DRB1_04_03_02--DRB1_09_01_10	0.057	9.45455
DRB1_04_03_02--DRB1_10_01_01_02	0.078	13.9091
DRB1_04_03_02--DRB1_11_01_08	0.065	18.6364
DRB1_04_03_02--DRB1_11_02_01	0.065	6.63636
DRB1_04_03_02--DRB1_11_03_01	0.065	16.4545
DRB1_04_03_02--DRB1_11_04_01	0.065	62.6364
DRB1_04_03_02--DRB1_11_05	0.065	22.0909
DRB1_04_03_02--DRB1_11_06_01	0.065	54.6364
DRB1_04_03_02--DRB1_11_08_02	0.065	51.9091
DRB1_04_03_02--DRB1_11_09	0.078	18.6364
DRB1_04_03_02--DRB1_11_11_01	0.065	1.1
DRB1_04_03_02--DRB1_11_12_01	0.071	18.6364
DRB1_04_03_02--DRB1_11_13_02	0.078	43.3636
DRB1_04_03_02--DRB1_11_14_01	0.065	1.63636
DRB1_04_03_02--DRB1_11_15	0.078	18.6364
DRB1_04_03_02--DRB1_11_19_01	0.065	17.8182
DRB1_04_03_02--DRB1_11_27_01	0.065	14.3636
DRB1_04_03_02--DRB1_11_32	0.065	7.18182
DRB1_04_03_02--DRB1_11_34	0.065	92.0909
DRB1_04_03_02--DRB1_12_01_01_02	0.092	83.9091
DRB1_04_03_02--DRB1_12_02_06	0.092	76.4545
DRB1_04_03_02--DRB1_12_06	0.085	83.9091
DRB1_04_03_02--DRB1_12_10	0.092	83.9091
DRB1_04_03_02--DRB1_13_01_13	0.071	6.63636
DRB1_04_03_02--DRB1_13_02_01	0.071	1.63636
DRB1_04_03_02--DRB1_13_03_01	0.058	34.4545
DRB1_04_03_02--DRB1_13_04	0.058	42.5455
DRB1_04_03_02--DRB1_13_05_01	0.071	18.6364
DRB1_04_03_02--DRB1_13_06	0.071	56.3636
DRB1_04_03_02--DRB1_13_10	0.071	42.5455
DRB1_04_03_02--DRB1_13_11_01	0.058	62.6364
DRB1_04_03_02--DRB1_13_12_01	0.058	53.1818
DRB1_04_03_02--DRB1_13_14_02	0.058	18.6364
DRB1_04_03_02--DRB1_13_17	0.064	12.6364
DRB1_04_03_02--DRB1_13_20	0.071	35.7273
DRB1_04_03_02--DRB1_13_26_01	0.071	8.54545
DRB1_04_03_02--DRB1_13_27	0.071	5.09091
DRB1_04_03_02--DRB1_13_36	0.071	1.09091
DRB1_04_03_02--DRB1_14_01_01	0.084	5.36364
DRB1_04_03_02--DRB1_14_02_01	0.071	31.9091
DRB1_04_03_02--DRB1_14_03_01	0.071	8.72727
DRB1_04_03_02--DRB1_14_04_01	0.084	13.4545
DRB1_04_03_02--DRB1_14_05_01	0.077	4
DRB1_04_03_02--DRB1_14_06_01	0.071	87.4545
DRB1_04_03_02--DRB1_14_07_01	0.077	11
DRB1_04_03_02--DRB1_14_08	0.077	4
DRB1_04_03_02--DRB1_14_14	0.071	2.75
DRB1_04_03_02--DRB1_14_17	0.071	92.0909
DRB1_04_03_02--DRB1_14_21	0.071	79.1818
DRB1_04_03_02--DRB1_14_54_05	0.077	5.36364
DRB1_04_03_02--DRB1_15_01_01_01	0.065	10.1818
DRB1_04_03_02--DRB1_15_02_01_01	0.065	1.18182
DRB1_04_03_02--DRB1_15_03_01_02	0.065	12
DRB1_04_03_02--DRB1_15_04	0.065	11.5455
DRB1_04_03_02--DRB1_16_01_01	0.065	3.72727
DRB1_04_03_02--DRB1_16_02_01_02	0.065	21.9091
DRB1_04_03_02--DRB1_16_03	0.072	3.72727
DRB1_04_03_02--DRB1_16_04	0.065	2.75
DRB1_04_03_02--DRB1_16_09_02	0.065	7.90909
DRB1_04_04_01--DRB1_04_05_01	0	1.04386
DRB1_04_04_01--DRB1_04_06_02	0.006	10.3636
DRB1_04_04_01--DRB1_04_07_01	0	19
DRB1_04_04_01--DRB1_04_08_01	0	1.72727
DRB1_04_04_01--DRB1_04_10_03	0	3.25439
DRB1_04_04_01--DRB1_04_11_01	0	2.11111
DRB1_04_04_01--DRB1_04_15	0.006	2
DRB1_04_04_01--DRB1_04_16	0.006	1.22581
DRB1_04_04_01--DRB1_04_32	0.006	1
DRB1_04_04_01--DRB1_04_92	0	19
DRB1_04_04_01--DRB1_07_01_01_02	0.071	2.03509
DRB1_04_04_01--DRB1_07_04	0.071	1.96552
DRB1_04_04_01--DRB1_08_01_01	0.064	1.84211
DRB1_04_04_01--DRB1_08_02_02	0.064	14.25
DRB1_04_04_01--DRB1_08_03_02	0.064	2.68421
DRB1_04_04_01--DRB1_08_04_01	0.064	1.94737
DRB1_04_04_01--DRB1_08_06	0.064	11.4035
DRB1_04_04_01--DRB1_08_07	0.064	7.125
DRB1_04_04_01--DRB1_08_09	0.077	14.25
DRB1_04_04_01--DRB1_08_11	0.064	6.33333
DRB1_04_04_01--DRB1_08_18	0.064	7.26316
DRB1_04_04_01--DRB1_09_01_10	0.057	1.09615
DRB1_04_04_01--DRB1_10_01_01_02	0.078	1.34211
DRB1_04_04_01--DRB1_11_01_08	0.065	1.79825
DRB1_04_04_01--DRB1_11_02_01	0.065	1.56164
DRB1_04_04_01--DRB1_11_03_01	0.065	1.58772
DRB1_04_04_01--DRB1_11_04_01	0.065	6.04386
DRB1_04_04_01--DRB1_11_05	0.065	2.13158
DRB1_04_04_01--DRB1_11_06_01	0.065	5.27193
DRB1_04_04_01--DRB1_11_08_02	0.065	5.00877
DRB1_04_04_01--DRB1_11_09	0.078	1.79825
DRB1_04_04_01--DRB1_11_11_01	0.065	11.4
DRB1_04_04_01--DRB1_11_12_01	0.071	1.79825
DRB1_04_04_01--DRB1_11_13_02	0.078	4.18421
DRB1_04_04_01--DRB1_11_14_01	0.065	6.33333
DRB1_04_04_01--DRB1_11_15	0.078	1.79825
DRB1_04_04_01--DRB1_11_19_01	0.065	1.7193
DRB1_04_04_01--DRB1_11_27_01	0.065	1.38596
DRB1_04_04_01--DRB1_11_32	0.065	1.44304
DRB1_04_04_01--DRB1_11_34	0.065	8.88596
DRB1_04_04_01--DRB1_12_01_01_02	0.092	8.09649
DRB1_04_04_01--DRB1_12_02_06	0.092	7.37719
DRB1_04_04_01--DRB1_12_06	0.085	8.09649
DRB1_04_04_01--DRB1_12_10	0.092	8.09649
DRB1_04_04_01--DRB1_13_01_13	0.071	1.56164
DRB1_04_04_01--DRB1_13_02_01	0.071	6.33333
DRB1_04_04_01--DRB1_13_03_01	0.058	3.32456
DRB1_04_04_01--DRB1_13_04	0.058	4.10526
DRB1_04_04_01--DRB1_13_05_01	0.071	1.79825
DRB1_04_04_01--DRB1_13_06	0.071	5.4386
DRB1_04_04_01--DRB1_13_10	0.071	4.10526
DRB1_04_04_01--DRB1_13_11_01	0.058	6.04386
DRB1_04_04_01--DRB1_13_12_01	0.058	5.13158
DRB1_04_04_01--DRB1_13_14_02	0.058	1.79825
DRB1_04_04_01--DRB1_13_17	0.064	1.2193
DRB1_04_04_01--DRB1_13_20	0.071	3.44737
DRB1_04_04_01--DRB1_13_26_01	0.071	1.21277
DRB1_04_04_01--DRB1_13_27	0.071	2.03571
DRB1_04_04_01--DRB1_13_36	0.071	9.5
DRB1_04_04_01--DRB1_14_01_01	0.084	1.9322
DRB1_04_04_01--DRB1_14_02_01	0.071	3.07895
DRB1_04_04_01--DRB1_14_03_01	0.071	1.1875
DRB1_04_04_01--DRB1_14_04_01	0.084	1.29825
DRB1_04_04_01--DRB1_14_05_01	0.077	2.59091
DRB1_04_04_01--DRB1_14_06_01	0.071	8.4386
DRB1_04_04_01--DRB1_14_07_01	0.077	114
DRB1_04_04_01--DRB1_14_08	0.077	2.59091
DRB1_04_04_01--DRB1_14_14	0.071	28.5
DRB1_04_04_01--DRB1_14_17	0.071	8.88596
DRB1_04_04_01--DRB1_14_21	0.071	7.64035
DRB1_04_04_01--DRB1_14_54_05	0.077	1.9322
DRB1_04_04_01--DRB1_15_01_01_01	0.065	1.01786
DRB1_04_04_01--DRB1_15_02_01_01	0.065	8.76923
DRB1_04_04_01--DRB1_15_03_01_02	0.065	1.15789
DRB1_04_04_01--DRB1_15_04	0.065	1.11404
DRB1_04_04_01--DRB1_16_01_01	0.065	2.78049
DRB1_04_04_01--DRB1_16_02_01_02	0.065	2.11404
DRB1_04_04_01--DRB1_16_03	0.072	2.78049
DRB1_04_04_01--DRB1_16_04	0.065	28.5
DRB1_04_04_01--DRB1_16_09_02	0.065	1.31034
DRB1_04_05_01--DRB1_04_06_02	0.006	10.8182
DRB1_04_05_01--DRB1_04_07_01	0	19.8333
DRB1_04_05_01--DRB1_04_08_01	0	1.80303
DRB1_04_05_01--DRB1_04_10_03	0	3.11765
DRB1_04_05_01--DRB1_04_11_01	0	2.2037
DRB1_04_05_01--DRB1_04_15	0.006	2.08772
DRB1_04_05_01--DRB1_04_16	0.006	1.27957
DRB1_04_05_01--DRB1_04_32	0.006	1.04386
DRB1_04_05_01--DRB1_04_92	0	19.8333
DRB1_04_05_01--DRB1_07_01_01_02	0.071	1.94958
DRB1_04_05_01--DRB1_07_04	0.071	2.05172
DRB1_04_05_01--DRB1_08_01_01	0.064	1.76471
DRB1_04_05_01--DRB1_08_02_02	0.064	14.875
DRB1_04_05_01--DRB1_08_03_02	0.064	2.57143
DRB1_04_05_01--DRB1_08_04_01	0.064	1.86555
DRB1_04_05_01--DRB1_08_06	0.064	10.9244
DRB1_04_05_01--DRB1_08_07	0.064	7.4375
DRB1_04_05_01--DRB1_08_09	0.077	14.875
DRB1_04_05_01--DRB1_08_11	0.064	6.61111
DRB1_04_05_01--DRB1_08_18	0.064	6.95798
DRB1_04_05_01--DRB1_09_01_10	0.057	1.14423
DRB1_04_05_01--DRB1_10_01_01_02	0.078	1.28571
DRB1_04_05_01--DRB1_11_01_08	0.065	1.72269
DRB1_04_05_01--DRB1_11_02_01	0.065	1.63014
DRB1_04_05_01--DRB1_11_03_01	0.065	1.52101
DRB1_04_05_01--DRB1_11_04_01	0.065	5.78992
DRB1_04_05_01--DRB1_11_05	0.065	2.04202
DRB1_04_05_01--DRB1_11_06_01	0.065	5.05042
DRB1_04_05_01--DRB1_11_08_02	0.065	4.79832
DRB1_04_05_01--DRB1_11_09	0.078	1.72269
DRB1_04_05_01--DRB1_11_11_01	0.065	11.9
DRB1_04_05_01--DRB1_11_12_01	0.071	1.72269
DRB1_04_05_01--DRB1_11_13_02	0.078	4.0084
DRB1_04_05_01--DRB1_11_14_01	0.065	6.61111
DRB1_04_05_01--DRB1_11_15	0.078	1.72269
DRB1_04_05_01--DRB1_11_19_01	0.065	1.64706
DRB1_04_05_01--DRB1_11_27_01	0.065	1.32773
DRB1_04_05_01--DRB1_11_32	0.065	1.50633
DRB1_04_05_01--DRB1_11_34	0.065	8.51261
DRB1_04_05_01--DRB1_12_01_01_02	0.092	7.7563
DRB1_04_05_01--DRB1_12_02_06	0.092	7.06723
DRB1_04_05_01--DRB1_12_06	0.085	7.7563
DRB1_04_05_01--DRB1_12_10	0.092	7.7563
DRB1_04_05_01--DRB1_13_01_13	0.071	1.63014
DRB1_04_05_01--DRB1_13_02_01	0.071	6.61111
DRB1_04_05_01--DRB1_13_03_01	0.058	3.18487
DRB1_04_05_01--DRB1_13_04	0.058	3.93277
DRB1_04_05_01--DRB1_13_05_01	0.071	1.72269
DRB1_04_05_01--DRB1_13_06	0.071	5.21008
DRB1_04_05_01--DRB1_13_10	0.071	3.93277
DRB1_04_05_01--DRB1_13_11_01	0.058	5.78992
DRB1_04_05_01--DRB1_13_12_01	0.058	4.91597
DRB1_04_05_01--DRB1_13_14_02	0.058	1.72269
DRB1_04_05_01--DRB1_13_17	0.064	1.16807
DRB1_04_05_01--DRB1_13_20	0.071	3.30252
DRB1_04_05_01--DRB1_13_26_01	0.071	1.26596
DRB1_04_05_01--DRB1_13_27	0.071	2.125
DRB1_04_05_01--DRB1_13_36	0.071	9.91667
DRB1_04_05_01--DRB1_14_01_01	0.084	2.01695
DRB1_04_05_01--DRB1_14_02_01	0.071	2.94958
DRB1_04_05_01--DRB1_14_03_01	0.071	1.23958
DRB1_04_05_01--DRB1_14_04_01	0.084	1.2437
DRB1_04_05_01--DRB1_14_05_01	0.077	2.70455
DRB1_04_05_01--DRB1_14_06_01	0.071	8.08403
DRB1_04_05_01--DRB1_14_07_01	0.077	119
DRB1_04_05_01--DRB1_14_08	0.077	2.70455
DRB1_04_05_01--DRB1_14_14	0.071	29.75
DRB1_04_05_01--DRB1_14_17	0.071	8.51261
DRB1_04_05_01--DRB1_14_21	0.071	7.31933
DRB1_04_05_01--DRB1_14_54_05	0.077	2.01695
DRB1_04_05_01--DRB1_15_01_01_01	0.065	1.0625
DRB1_04_05_01--DRB1_15_02_01_01	0.065	9.15385
DRB1_04_05_01--DRB1_15_03_01_02	0.065	1.10924
DRB1_04_05_01--DRB1_15_04	0.065	1.06723
DRB1_04_05_01--DRB1_16_01_01	0.065	2.90244
DRB1_04_05_01--DRB1_16_02_01_02	0.065	2.02521
DRB1_04_05_01--DRB1_16_03	0.072	2.90244
DRB1_04_05_01--DRB1_16_04	0.065	29.75
DRB1_04_05_01--DRB1_16_09_02	0.065	1.36782
DRB1_04_06_02--DRB1_04_07_01	0.006	1.83333
DRB1_04_06_02--DRB1_04_08_01	0.006	6
DRB1_04_06_02--DRB1_04_10_03	0.006	33.7273
DRB1_04_06_02--DRB1_04_11_01	0.006	4.90909
DRB1_04_06_02--DRB1_04_15	0.013	5.18182
DRB1_04_06_02--DRB1_04_16	0.013	8.45455
DRB1_04_06_02--DRB1_04_32	0.013	10.3636
DRB1_04_06_02--DRB1_04_92	0.006	1.83333
DRB1_04_06_02--DRB1_07_01_01_02	0.07	21.0909
DRB1_04_06_02--DRB1_07_04	0.07	5.27273
DRB1_04_06_02--DRB1_08_01_01	0.071	19.0909
DRB1_04_06_02--DRB1_08_02_02	0.071	1.375
DRB1_04_06_02--DRB1_08_03_02	0.071	27.8182
DRB1_04_06_02--DRB1_08_04_01	0.071	20.1818
DRB1_04_06_02--DRB1_08_06	0.071	118.182
DRB1_04_06_02--DRB1_08_07	0.071	1.45455
DRB1_04_06_02--DRB1_08_09	0.077	1.375
DRB1_04_06_02--DRB1_08_11	0.071	1.63636
DRB1_04_06_02--DRB1_08_18	0.071	75.2727
DRB1_04_06_02--DRB1_09_01_10	0.057	9.45455
DRB1_04_06_02--DRB1_10_01_01_02	0.084	13.9091
DRB1_04_06_02--DRB1_11_01_08	0.071	18.6364
DRB1_04_06_02--DRB1_11_02_01	0.071	6.63636
DRB1_04_06_02--DRB1_11_03_01	0.071	16.4545
DRB1_04_06_02--DRB1_11_04_01	0.071	62.6364
DRB1_04_06_02--DRB1_11_05	0.071	22.0909
DRB1_04_06_02--DRB1_11_06_01	0.071	54.6364
DRB1_04_06_02--DRB1_11_08_02	0.071	51.9091
DRB1_04_06_02--DRB1_11_09	0.077	18.6364
DRB1_04_06_02--DRB1_11_11_01	0.071	1.1
DRB1_04_06_02--DRB1_11_12_01	0.071	18.6364
DRB1_04_06_02--DRB1_11_13_02	0.077	43.3636
DRB1_04_06_02--DRB1_11_14_01	0.071	1.63636
DRB1_04_06_02--DRB1_11_15	0.079	18.6364
DRB1_04_06_02--DRB1_11_19_01	0.071	17.8182
DRB1_04_06_02--DRB1_11_27_01	0.071	14.3636
DRB1_04_06_02--DRB1_11_32	0.071	7.18182
DRB1_04_06_02--DRB1_11_34	0.071	92.0909
DRB1_04_06_02--DRB1_12_01_01_02	0.091	83.9091
DRB1_04_06_02--DRB1_12_02_06	0.091	76.4545
DRB1_04_06_02--DRB1_12_06	0.085	83.9091
DRB1_04_06_02--DRB1_12_10	0.091	83.9091
DRB1_04_06_02--DRB1_13_01_13	0.07	6.63636
DRB1_04_06_02--DRB1_13_02_01	0.07	1.63636
DRB1_04_06_02--DRB1_13_03_01	0.064	34.4545
DRB1_04_06_02--DRB1_13_04	0.064	42.5455
DRB1_04_06_02--DRB1_13_05_01	0.07	18.6364
DRB1_04_06_02--DRB1_13_06	0.07	56.3636
DRB1_04_06_02--DRB1_13_10	0.07	42.5455
DRB1_04_06_02--DRB1_13_11_01	0.064	62.6364
DRB1_04_06_02--DRB1_13_12_01	0.064	53.1818
DRB1_04_06_02--DRB1_13_14_02	0.064	18.6364
DRB1_04_06_02--DRB1_13_17	0.071	12.6364
DRB1_04_06_02--DRB1_13_20	0.07	35.7273
DRB1_04_06_02--DRB1_13_26_01	0.07	8.54545
DRB1_04_06_02--DRB1_13_27	0.07	5.09091
DRB1_04_06_02--DRB1_13_36	0.07	1.09091
DRB1_04_06_02--DRB1_14_01_01	0.084	5.36364
DRB1_04_06_02--DRB1_14_02_01	0.07	31.9091
DRB1_04_06_02--DRB1_14_03_01	0.07	8.72727
DRB1_04_06_02--DRB1_14_04_01	0.084	13.4545
DRB1_04_06_02--DRB1_14_05_01	0.077	4
DRB1_04_06_02--DRB1_14_06_01	0.07	87.4545
DRB1_04_06_02--DRB1_14_07_01	0.077	11
DRB1_04_06_02--DRB1_14_08	0.077	4
DRB1_04_06_02--DRB1_14_14	0.071	2.75
DRB1_04_06_02--DRB1_14_17	0.07	92.0909
DRB1_04_06_02--DRB1_14_21	0.07	79.1818
DRB1_04_06_02--DRB1_14_54_05	0.077	5.36364
DRB1_04_06_02--DRB1_15_01_01_01	0.058	10.1818
DRB1_04_06_02--DRB1_15_02_01_01	0.058	1.18182
DRB1_04_06_02--DRB1_15_03_01_02	0.058	12
DRB1_04_06_02--DRB1_15_04	0.058	11.5455
DRB1_04_06_02--DRB1_16_01_01	0.058	3.72727
DRB1_04_06_02--DRB1_16_02_01_02	0.058	21.9091
DRB1_04_06_02--DRB1_16_03	0.065	3.72727
DRB1_04_06_02--DRB1_16_04	0.058	2.75
DRB1_04_06_02--DRB1_16_09_02	0.058	7.90909
DRB1_04_07_01--DRB1_04_08_01	0	11
DRB1_04_07_01--DRB1_04_10_03	0	61.8333
DRB1_04_07_01--DRB1_04_11_01	0	9
DRB1_04_07_01--DRB1_04_15	0.006	9.5
DRB1_04_07_01--DRB1_04_16	0.006	15.5
DRB1_04_07_01--DRB1_04_32	0.006	19
DRB1_04_07_01--DRB1_04_92	0	1
DRB1_04_07_01--DRB1_07_01_01_02	0.071	38.6667
DRB1_04_07_01--DRB1_07_04	0.071	9.66667
DRB1_04_07_01--DRB1_08_01_01	0.064	35
DRB1_04_07_01--DRB1_08_02_02	0.064	1.33333
DRB1_04_07_01--DRB1_08_03_02	0.064	51
DRB1_04_07_01--DRB1_08_04_01	0.064	37
DRB1_04_07_01--DRB1_08_06	0.064	216.667
DRB1_04_07_01--DRB1_08_07	0.064	2.66667
DRB1_04_07_01--DRB1_08_09	0.077	1.33333
DRB1_04_07_01--DRB1_08_11	0.064	3
DRB1_04_07_01--DRB1_08_18	0.064	138
DRB1_04_07_01--DRB1_09_01_10	0.057	17.3333
DRB1_04_07_01--DRB1_10_01_01_02	0.078	25.5
DRB1_04_07_01--DRB1_11_01_08	0.065	34.1667
DRB1_04_07_01--DRB1_11_02_01	0.065	12.1667
DRB1_04_07_01--DRB1_11_03_01	0.065	30.1667
DRB1_04_07_01--DRB1_11_04_01	0.065	114.833
DRB1_04_07_01--DRB1_11_05	0.065	40.5
DRB1_04_07_01--DRB1_11_06_01	0.065	100.167
DRB1_04_07_01--DRB1_11_08_02	0.065	95.1667
DRB1_04_07_01--DRB1_11_09	0.078	34.1667
DRB1_04_07_01--DRB1_11_11_01	0.065	1.66667
DRB1_04_07_01--DRB1_11_12_01	0.071	34.1667
DRB1_04_07_01--DRB1_11_13_02	0.078	79.5
DRB1_04_07_01--DRB1_11_14_01	0.065	3
DRB1_04_07_01--DRB1_11_15	0.078	34.1667
DRB1_04_07_01--DRB1_11_19_01	0.065	32.6667
DRB1_04_07_01--DRB1_11_27_01	0.065	26.3333
DRB1_04_07_01--DRB1_11_32	0.065	13.1667
DRB1_04_07_01--DRB1_11_34	0.065	168.833
DRB1_04_07_01--DRB1_12_01_01_02	0.092	153.833
DRB1_04_07_01--DRB1_12_02_06	0.092	140.167
DRB1_04_07_01--DRB1_12_06	0.085	153.833
DRB1_04_07_01--DRB1_12_10	0.092	153.833
DRB1_04_07_01--DRB1_13_01_13	0.071	12.1667
DRB1_04_07_01--DRB1_13_02_01	0.071	3
DRB1_04_07_01--DRB1_13_03_01	0.058	63.1667
DRB1_04_07_01--DRB1_13_04	0.058	78
DRB1_04_07_01--DRB1_13_05_01	0.071	34.1667
DRB1_04_07_01--DRB1_13_06	0.071	103.333
DRB1_04_07_01--DRB1_13_10	0.071	78
DRB1_04_07_01--DRB1_13_11_01	0.058	114.833
DRB1_04_07_01--DRB1_13_12_01	0.058	97.5
DRB1_04_07_01--DRB1_13_14_02	0.058	34.1667
DRB1_04_07_01--DRB1_13_17	0.064	23.1667
DRB1_04_07_01--DRB1_13_20	0.071	65.5
DRB1_04_07_01--DRB1_13_26_01	0.071	15.6667
DRB1_04_07_01--DRB1_13_27	0.071	9.33333
DRB1_04_07_01--DRB1_13_36	0.071	2
DRB1_04_07_01--DRB1_14_01_01	0.084	9.83333
DRB1_04_07_01--DRB1_14_02_01	0.071	58.5
DRB1_04_07_01--DRB1_14_03_01	0.071	16
DRB1_04_07_01--DRB1_14_04_01	0.084	24.6667
DRB1_04_07_01--DRB1_14_05_01	0.077	7.33333
DRB1_04_07_01--DRB1_14_06_01	0.071	160.333
DRB1_04_07_01--DRB1_14_07_01	0.077	6
DRB1_04_07_01--DRB1_14_08	0.077	7.33333
DRB1_04_07_01--DRB1_14_14	0.071	1.5
DRB1_04_07_01--DRB1_14_17	0.071	168.833
DRB1_04_07_01--DRB1_14_21	0.071	145.167
DRB1_04_07_01--DRB1_14_54_05	0.077	9.83333
DRB1_04_07_01--DRB1_15_01_01_01	0.065	18.6667
DRB1_04_07_01--DRB1_15_02_01_01	0.065	2.16667
DRB1_04_07_01--DRB1_15_03_01_02	0.065	22
DRB1_04_07_01--DRB1_15_04	0.065	21.1667
DRB1_04_07_01--DRB1_16_01_01	0.065	6.83333
DRB1_04_07_01--DRB1_16_02_01_02	0.065	40.1667
DRB1_04_07_01--DRB1_16_03	0.072	6.83333
DRB1_04_07_01--DRB1_16_04	0.065	1.5
DRB1_04_07_01--DRB1_16_09_02	0.065	14.5
DRB1_04_08_01--DRB1_04_10_03	0	5.62121
DRB1_04_08_01--DRB1_04_11_01	0	1.22222
DRB1_04_08_01--DRB1_04_15	0.006	1.15789
DRB1_04_08_01--DRB1_04_16	0.006	1.40909
DRB1_04_08_01--DRB1_04_32	0.006	1.72727
DRB1_04_08_01--DRB1_04_92	0	11
DRB1_04_08_01--DRB1_07_01_01_02	0.071	3.51515
DRB1_04_08_01--DRB1_07_04	0.071	1.13793
DRB1_04_08_01--DRB1_08_01_01	0.064	3.18182
DRB1_04_08_01--DRB1_08_02_02	0.064	8.25
DRB1_04_08_01--DRB1_08_03_02	0.064	4.63636
DRB1_04_08_01--DRB1_08_04_01	0.064	3.36364
DRB1_04_08_01--DRB1_08_06	0.064	19.697
DRB1_04_08_01--DRB1_08_07	0.064	4.125
DRB1_04_08_01--DRB1_08_09	0.077	8.25
DRB1_04_08_01--DRB1_08_11	0.064	3.66667
DRB1_04_08_01--DRB1_08_18	0.064	12.5455
DRB1_04_08_01--DRB1_09_01_10	0.057	1.57576
DRB1_04_08_01--DRB1_10_01_01_02	0.078	2.31818
DRB1_04_08_01--DRB1_11_01_08	0.065	3.10606
DRB1_04_08_01--DRB1_11_02_01	0.065	1.10606
DRB1_04_08_01--DRB1_11_03_01	0.065	2.74242
DRB1_04_08_01--DRB1_11_04_01	0.065	10.4394
DRB1_04_08_01--DRB1_11_05	0.065	3.68182
DRB1_04_08_01--DRB1_11_06_01	0.065	9.10606
DRB1_04_08_01--DRB1_11_08_02	0.065	8.65152
DRB1_04_08_01--DRB1_11_09	0.078	3.10606
DRB1_04_08_01--DRB1_11_11_01	0.065	6.6
DRB1_04_08_01--DRB1_11_12_01	0.071	3.10606
DRB1_04_08_01--DRB1_11_13_02	0.078	7.22727
DRB1_04_08_01--DRB1_11_14_01	0.065	3.66667
DRB1_04_08_01--DRB1_11_15	0.078	3.10606
DRB1_04_08_01--DRB1_11_19_01	0.065	2.9697
DRB1_04_08_01--DRB1_11_27_01	0.065	2.39394
DRB1_04_08_01--DRB1_11_32	0.065	1.19697
DRB1_04_08_01--DRB1_11_34	0.065	15.3485
DRB1_04_08_01--DRB1_12_01_01_02	0.092	13.9848
DRB1_04_08_01--DRB1_12_02_06	0.092	12.7424
DRB1_04_08_01--DRB1_12_06	0.085	13.9848
DRB1_04_08_01--DRB1_12_10	0.092	13.9848
DRB1_04_08_01--DRB1_13_01_13	0.071	1.10606
DRB1_04_08_01--DRB1_13_02_01	0.071	3.66667
DRB1_04_08_01--DRB1_13_03_01	0.058	5.74242
DRB1_04_08_01--DRB1_13_04	0.058	7.09091
DRB1_04_08_01--DRB1_13_05_01	0.071	3.10606
DRB1_04_08_01--DRB1_13_06	0.071	9.39394
DRB1_04_08_01--DRB1_13_10	0.071	7.09091
DRB1_04_08_01--DRB1_13_11_01	0.058	10.4394
DRB1_04_08_01--DRB1_13_12_01	0.058	8.86364
DRB1_04_08_01--DRB1_13_14_02	0.058	3.10606
DRB1_04_08_01--DRB1_13_17	0.064	2.10606
DRB1_04_08_01--DRB1_13_20	0.071	5.95455
DRB1_04_08_01--DRB1_13_26_01	0.071	1.42424
DRB1_04_08_01--DRB1_13_27	0.071	1.17857
DRB1_04_08_01--DRB1_13_36	0.071	5.5
DRB1_04_08_01--DRB1_14_01_01	0.084	1.11864
DRB1_04_08_01--DRB1_14_02_01	0.071	5.31818
DRB1_04_08_01--DRB1_14_03_01	0.071	1.45455
DRB1_04_08_01--DRB1_14_04_01	0.084	2.24242
DRB1_04_08_01--DRB1_14_05_01	0.077	1.5
DRB1_04_08_01--DRB1_14_06_01	0.071	14.5758
DRB1_04_08_01--DRB1_14_07_01	0.077	66
DRB1_04_08_01--DRB1_14_08	0.077	1.5
DRB1_04_08_01--DRB1_14_14	0.071	16.5
DRB1_04_08_01--DRB1_14_17	0.071	15.3485
DRB1_04_08_01--DRB1_14_21	0.071	13.197
DRB1_04_08_01--DRB1_14_54_05	0.077	1.11864
DRB1_04_08_01--DRB1_15_01_01_01	0.065	1.69697
DRB1_04_08_01--DRB1_15_02_01_01	0.065	5.07692
DRB1_04_08_01--DRB1_15_03_01_02	0.065	2
DRB1_04_08_01--DRB1_15_04	0.065	1.92424
DRB1_04_08_01--DRB1_16_01_01	0.065	1.60976
DRB1_04_08_01--DRB1_16_02_01_02	0.065	3.65152
DRB1_04_08_01--DRB1_16_03	0.072	1.60976
DRB1_04_08_01--DRB1_16_04	0.065	16.5
DRB1_04_08_01--DRB1_16_09_02	0.065	1.31818
DRB1_04_10_03--DRB1_04_11_01	0	6.87037
DRB1_04_10_03--DRB1_04_15	0.006	6.50877
DRB1_04_10_03--DRB1_04_16	0.006	3.98925
DRB1_04_10_03--DRB1_04_32	0.006	3.25439
DRB1_04_10_03--DRB1_04_92	0	61.8333
DRB1_04_10_03--DRB1_07_01_01_02	0.071	1.59914
DRB1_04_10_03--DRB1_07_04	0.071	6.39655
DRB1_04_10_03--DRB1_08_01_01	0.064	1.76667
DRB1_04_10_03--DRB1_08_02_02	0.064	46.375
DRB1_04_10_03--DRB1_08_03_02	0.064	1.21242
DRB1_04_10_03--DRB1_08_04_01	0.064	1.67117
DRB1_04_10_03--DRB1_08_06	0.064	3.50404
DRB1_04_10_03--DRB1_08_07	0.064	23.1875
DRB1_04_10_03--DRB1_08_09	0.077	46.375
DRB1_04_10_03--DRB1_08_11	0.064	20.6111
DRB1_04_10_03--DRB1_08_18	0.064	2.23181
DRB1_04_10_03--DRB1_09_01_10	0.057	3.56731
DRB1_04_10_03--DRB1_10_01_01_02	0.078	2.42484
DRB1_04_10_03--DRB1_11_01_08	0.065	1.80976
DRB1_04_10_03--DRB1_11_02_01	0.065	5.08219
DRB1_04_10_03--DRB1_11_03_01	0.065	2.04972
DRB1_04_10_03--DRB1_11_04_01	0.065	1.85714
DRB1_04_10_03--DRB1_11_05	0.065	1.52675
DRB1_04_10_03--DRB1_11_06_01	0.065	1.61995
DRB1_04_10_03--DRB1_11_08_02	0.065	1.53908
DRB1_04_10_03--DRB1_11_09	0.078	1.80976
DRB1_04_10_03--DRB1_11_11_01	0.065	37.1
DRB1_04_10_03--DRB1_11_12_01	0.071	1.80976
DRB1_04_10_03--DRB1_11_13_02	0.078	1.28571
DRB1_04_10_03--DRB1_11_14_01	0.065	20.6111
DRB1_04_10_03--DRB1_11_15	0.078	1.80976
DRB1_04_10_03--DRB1_11_19_01	0.065	1.89286
DRB1_04_10_03--DRB1_11_27_01	0.065	2.3481
DRB1_04_10_03--DRB1_11_32	0.065	4.6962
DRB1_04_10_03--DRB1_11_34	0.065	2.73046
DRB1_04_10_03--DRB1_12_01_01_02	0.092	2.48787
DRB1_04_10_03--DRB1_12_02_06	0.092	2.26685
DRB1_04_10_03--DRB1_12_06	0.085	2.48787
DRB1_04_10_03--DRB1_12_10	0.092	2.48787
DRB1_04_10_03--DRB1_13_01_13	0.071	5.08219
DRB1_04_10_03--DRB1_13_02_01	0.071	20.6111
DRB1_04_10_03--DRB1_13_03_01	0.058	1.02156
DRB1_04_10_03--DRB1_13_04	0.058	1.26146
DRB1_04_10_03--DRB1_13_05_01	0.071	1.80976
DRB1_04_10_03--DRB1_13_06	0.071	1.67116
DRB1_04_10_03--DRB1_13_10	0.071	1.26146
DRB1_04_10_03--DRB1_13_11_01	0.058	1.85714
DRB1_04_10_03--DRB1_13_12_01	0.058	1.57682
DRB1_04_10_03--DRB1_13_14_02	0.058	1.80976
DRB1_04_10_03--DRB1_13_17	0.064	2.66906
DRB1_04_10_03--DRB1_13_20	0.071	1.0593
DRB1_04_10_03--DRB1_13_26_01	0.071	3.94681
DRB1_04_10_03--DRB1_13_27	0.071	6.625
DRB1_04_10_03--DRB1_13_36	0.071	30.9167
DRB1_04_10_03--DRB1_14_01_01	0.084	6.28814
DRB1_04_10_03--DRB1_14_02_01	0.071	1.05698
DRB1_04_10_03--DRB1_14_03_01	0.071	3.86458
DRB1_04_10_03--DRB1_14_04_01	0.084	2.50676
DRB1_04_10_03--DRB1_14_05_01	0.077	8.43182
DRB1_04_10_03--DRB1_14_06_01	0.071	2.59299
DRB1_04_10_03--DRB1_14_07_01	0.077	371
DRB1_04_10_03--DRB1_14_08	0.077	8.43182
DRB1_04_10_03--DRB1_14_14	0.071	92.75
DRB1_04_10_03--DRB1_14_17	0.071	2.73046
DRB1_04_10_03--DRB1_14_21	0.071	2.34771
DRB1_04_10_03--DRB1_14_54_05	0.077	6.28814
DRB1_04_10_03--DRB1_15_01_01_01	0.065	3.3125
DRB1_04_10_03--DRB1_15_02_01_01	0.065	28.5385
DRB1_04_10_03--DRB1_15_03_01_02	0.065	2.81061
DRB1_04_10_03--DRB1_15_04	0.065	2.92126
DRB1_04_10_03--DRB1_16_01_01	0.065	9.04878
DRB1_04_10_03--DRB1_16_02_01_02	0.065	1.53942
DRB1_04_10_03--DRB1_16_03	0.072	9.04878
DRB1_04_10_03--DRB1_16_04	0.065	92.75
DRB1_04_10_03--DRB1_16_09_02	0.065	4.26437
DRB1_04_11_01--DRB1_04_15	0.006	1.05556
DRB1_04_11_01--DRB1_04_16	0.006	1.72222
DRB1_04_11_01--DRB1_04_32	0.006	2.11111
DRB1_04_11_01--DRB1_04_92	0	9
DRB1_04_11_01--DRB1_07_01_01_02	0.071	4.2963
DRB1_04_11_01--DRB1_07_04	0.071	1.07407
DRB1_04_11_01--DRB1_08_01_01	0.064	3.88889
DRB1_04_11_01--DRB1_08_02_02	0.064	6.75
DRB1_04_11_01--DRB1_08_03_02	0.064	5.66667
DRB1_04_11_01--DRB1_08_04_01	0.064	4.11111
DRB1_04_11_01--DRB1_08_06	0.064	24.0741
DRB1_04_11_01--DRB1_08_07	0.064	3.375
DRB1_04_11_01--DRB1_08_09	0.077	6.75
DRB1_04_11_01--DRB1_08_11	0.064	3
DRB1_04_11_01--DRB1_08_18	0.064	15.3333
DRB1_04_11_01--DRB1_09_01_10	0.057	1.92593
DRB1_04_11_01--DRB1_10_01_01_02	0.078	2.83333
DRB1_04_11_01--DRB1_11_01_08	0.065	3.7963
DRB1_04_11_01--DRB1_11_02_01	0.065	1.35185
DRB1_04_11_01--DRB1_11_03_01	0.065	3.35185
DRB1_04_11_01--DRB1_11_04_01	0.065	12.7593
DRB1_04_11_01--DRB1_11_05	0.065	4.5
DRB1_04_11_01--DRB1_11_06_01	0.065	11.1296
DRB1_04_11_01--DRB1_11_08_02	0.065	10.5741
DRB1_04_11_01--DRB1_11_09	0.078	3.7963
DRB1_04_11_01--DRB1_11_11_01	0.065	5.4
DRB1_04_11_01--DRB1_11_12_01	0.071	3.7963
DRB1_04_11_01--DRB1_11_13_02	0.078	8.83333
DRB1_04_11_01--DRB1_11_14_01	0.065	3
DRB1_04_11_01--DRB1_11_15	0.078	3.7963
DRB1_04_11_01--DRB1_11_19_01	0.065	3.62963
DRB1_04_11_01--DRB1_11_27_01	0.065	2.92593
DRB1_04_11_01--DRB1_11_32	0.065	1.46296
DRB1_04_11_01--DRB1_11_34	0.065	18.7593
DRB1_04_11_01--DRB1_12_01_01_02	0.092	17.0926
DRB1_04_11_01--DRB1_12_02_06	0.092	15.5741
DRB1_04_11_01--DRB1_12_06	0.085	17.0926
DRB1_04_11_01--DRB1_12_10	0.092	17.0926
DRB1_04_11_01--DRB1_13_01_13	0.071	1.35185
DRB1_04_11_01--DRB1_13_02_01	0.071	3
DRB1_04_11_01--DRB1_13_03_01	0.058	7.01852
DRB1_04_11_01--DRB1_13_04	0.058	8.66667
DRB1_04_11_01--DRB1_13_05_01	0.071	3.7963
DRB1_04_11_01--DRB1_13_06	0.071	11.4815
DRB1_04_11_01--DRB1_13_10	0.071	8.66667
DRB1_04_11_01--DRB1_13_11_01	0.058	12.7593
DRB1_04_11_01--DRB1_13_12_01	0.058	10.8333
DRB1_04_11_01--DRB1_13_14_02	0.058	3.7963
DRB1_04_11_01--DRB1_13_17	0.064	2.57407
DRB1_04_11_01--DRB1_13_20	0.071	7.27778
DRB1_04_11_01--DRB1_13_26_01	0.071	1.74074
DRB1_04_11_01--DRB1_13_27	0.071	1.03704
DRB1_04_11_01--DRB1_13_36	0.071	4.5
DRB1_04_11_01--DRB1_14_01_01	0.084	1.09259
DRB1_04_11_01--DRB1_14_02_01	0.071	6.5
DRB1_04_11_01--DRB1_14_03_01	0.071	1.77778
DRB1_04_11_01--DRB1_14_04_01	0.084	2.74074
DRB1_04_11_01--DRB1_14_05_01	0.077	1.22727
DRB1_04_11_01--DRB1_14_06_01	0.071	17.8148
DRB1_04_11_01--DRB1_14_07_01	0.077	54
DRB1_04_11_01--DRB1_14_08	0.077	1.22727
DRB1_04_11_01--DRB1_14_14	0.071	13.5
DRB1_04_11_01--DRB1_14_17	0.071	18.7593
DRB1_04_11_01--DRB1_14_21	0.071	16.1296
DRB1_04_11_01--DRB1_14_54_05	0.077	1.09259
DRB1_04_11_01--DRB1_15_01_01_01	0.065	2.07407
DRB1_04_11_01--DRB1_15_02_01_01	0.065	4.15385
DRB1_04_11_01--DRB1_15_03_01_02	0.065	2.44444
DRB1_04_11_01--DRB1_15_04	0.065	2.35185
DRB1_04_11_01--DRB1_16_01_01	0.065	1.31707
DRB1_04_11_01--DRB1_16_02_01_02	0.065	4.46296
DRB1_04_11_01--DRB1_16_03	0.072	1.31707
DRB1_04_11_01--DRB1_16_04	0.065	13.5
DRB1_04_11_01--DRB1_16_09_02	0.065	1.61111
DRB1_04_15--DRB1_04_16	0.013	1.63158
DRB1_04_15--DRB1_04_32	0.013	2
DRB1_04_15--DRB1_04_92	0.006	9.5
DRB1_04_15--DRB1_07_01_01_02	0.077	4.07018
DRB1_04_15--DRB1_07_04	0.077	1.01754
DRB1_04_15--DRB1_08_01_01	0.071	3.68421
DRB1_04_15--DRB1_08_02_02	0.071	7.125
DRB1_04_15--DRB1_08_03_02	0.071	5.36842
DRB1_04_15--DRB1_08_04_01	0.071	3.89474
DRB1_04_15--DRB1_08_06	0.071	22.807
DRB1_04_15--DRB1_08_07	0.071	3.5625
DRB1_04_15--DRB1_08_09	0.084	7.125
DRB1_04_15--DRB1_08_11	0.071	3.16667
DRB1_04_15--DRB1_08_18	0.071	14.5263
DRB1_04_15--DRB1_09_01_10	0.064	1.82456
DRB1_04_15--DRB1_10_01_01_02	0.085	2.68421
DRB1_04_15--DRB1_11_01_08	0.058	3.59649
DRB1_04_15--DRB1_11_02_01	0.058	1.2807
DRB1_04_15--DRB1_11_03_01	0.058	3.17544
DRB1_04_15--DRB1_11_04_01	0.058	12.0877
DRB1_04_15--DRB1_11_05	0.058	4.26316
DRB1_04_15--DRB1_11_06_01	0.058	10.5439
DRB1_04_15--DRB1_11_08_02	0.058	10.0175
DRB1_04_15--DRB1_11_09	0.071	3.59649
DRB1_04_15--DRB1_11_11_01	0.058	5.7
DRB1_04_15--DRB1_11_12_01	0.064	3.59649
DRB1_04_15--DRB1_11_13_02	0.071	8.36842
DRB1_04_15--DRB1_11_14_01	0.058	3.16667
DRB1_04_15--DRB1_11_15	0.071	3.59649
DRB1_04_15--DRB1_11_19_01	0.058	3.4386
DRB1_04_15--DRB1_11_27_01	0.058	2.77193
DRB1_04_15--DRB1_11_32	0.058	1.38596
DRB1_04_15--DRB1_11_34	0.058	17.7719
DRB1_04_15--DRB1_12_01_01_02	0.099	16.193
DRB1_04_15--DRB1_12_02_06	0.099	14.7544
DRB1_04_15--DRB1_12_06	0.092	16.193
DRB1_04_15--DRB1_12_10	0.099	16.193
DRB1_04_15--DRB1_13_01_13	0.078	1.2807
DRB1_04_15--DRB1_13_02_01	0.078	3.16667
DRB1_04_15--DRB1_13_03_01	0.065	6.64912
DRB1_04_15--DRB1_13_04	0.065	8.21053
DRB1_04_15--DRB1_13_05_01	0.078	3.59649
DRB1_04_15--DRB1_13_06	0.078	10.8772
DRB1_04_15--DRB1_13_10	0.078	8.21053
DRB1_04_15--DRB1_13_11_01	0.065	12.0877
DRB1_04_15--DRB1_13_12_01	0.065	10.2632
DRB1_04_15--DRB1_13_14_02	0.065	3.59649
DRB1_04_15--DRB1_13_17	0.071	2.4386
DRB1_04_15--DRB1_13_20	0.078	6.89474
DRB1_04_15--DRB1_13_26_01	0.078	1.64912
DRB1_04_15--DRB1_13_27	0.078	1.01786
DRB1_04_15--DRB1_13_36	0.078	4.75
DRB1_04_15--DRB1_14_01_01	0.091	1.03509
DRB1_04_15--DRB1_14_02_01	0.078	6.15789
DRB1_04_15--DRB1_14_03_01	0.078	1.68421
DRB1_04_15--DRB1_14_04_01	0.091	2.59649
DRB1_04_15--DRB1_14_05_01	0.084	1.29545
DRB1_04_15--DRB1_14_06_01	0.078	16.8772
DRB1_04_15--DRB1_14_07_01	0.084	57
DRB1_04_15--DRB1_14_08	0.084	1.29545
DRB1_04_15--DRB1_14_14	0.078	14.25
DRB1_04_15--DRB1_14_17	0.078	17.7719
DRB1_04_15--DRB1_14_21	0.078	15.2807
DRB1_04_15--DRB1_14_54_05	0.084	1.03509
DRB1_04_15--DRB1_15_01_01_01	0.072	1.96491
DRB1_04_15--DRB1_15_02_01_01	0.072	4.38462
DRB1_04_15--DRB1_15_03_01_02	0.072	2.31579
DRB1_04_15--DRB1_15_04	0.072	2.22807
DRB1_04_15--DRB1_16_01_01	0.072	1.39024
DRB1_04_15--DRB1_16_02_01_02	0.072	4.22807
DRB1_04_15--DRB1_16_03	0.079	1.39024
DRB1_04_15--DRB1_16_04	0.072	14.25
DRB1_04_15--DRB1_16_09_02	0.072	1.52632
DRB1_04_16--DRB1_04_32	0.013	1.22581
DRB1_04_16--DRB1_04_92	0.006	15.5
DRB1_04_16--DRB1_07_01_01_02	0.077	2.49462
DRB1_04_16--DRB1_07_04	0.077	1.60345
DRB1_04_16--DRB1_08_01_01	0.071	2.25806
DRB1_04_16--DRB1_08_02_02	0.071	11.625
DRB1_04_16--DRB1_08_03_02	0.071	3.29032
DRB1_04_16--DRB1_08_04_01	0.071	2.3871
DRB1_04_16--DRB1_08_06	0.071	13.9785
DRB1_04_16--DRB1_08_07	0.071	5.8125
DRB1_04_16--DRB1_08_09	0.084	11.625
DRB1_04_16--DRB1_08_11	0.071	5.16667
DRB1_04_16--DRB1_08_18	0.071	8.90323
DRB1_04_16--DRB1_09_01_10	0.064	1.11828
DRB1_04_16--DRB1_10_01_01_02	0.084	1.64516
DRB1_04_16--DRB1_11_01_08	0.071	2.2043
DRB1_04_16--DRB1_11_02_01	0.071	1.27397
DRB1_04_16--DRB1_11_03_01	0.071	1.94624
DRB1_04_16--DRB1_11_04_01	0.071	7.4086
DRB1_04_16--DRB1_11_05	0.071	2.6129
DRB1_04_16--DRB1_11_06_01	0.071	6.46237
DRB1_04_16--DRB1_11_08_02	0.071	6.13978
DRB1_04_16--DRB1_11_09	0.084	2.2043
DRB1_04_16--DRB1_11_11_01	0.071	9.3
DRB1_04_16--DRB1_11_12_01	0.078	2.2043
DRB1_04_16--DRB1_11_13_02	0.084	5.12903
DRB1_04_16--DRB1_11_14_01	0.071	5.16667
DRB1_04_16--DRB1_11_15	0.085	2.2043
DRB1_04_16--DRB1_11_19_01	0.071	2.10753
DRB1_04_16--DRB1_11_27_01	0.071	1.69892
DRB1_04_16--DRB1_11_32	0.071	1.17722
DRB1_04_16--DRB1_11_34	0.071	10.8925
DRB1_04_16--DRB1_12_01_01_02	0.099	9.92473
DRB1_04_16--DRB1_12_02_06	0.099	9.04301
DRB1_04_16--DRB1_12_06	0.092	9.92473
DRB1_04_16--DRB1_12_10	0.099	9.92473
DRB1_04_16--DRB1_13_01_13	0.077	1.27397
DRB1_04_16--DRB1_13_02_01	0.077	5.16667
DRB1_04_16--DRB1_13_03_01	0.064	4.07527
DRB1_04_16--DRB1_13_04	0.064	5.03226
DRB1_04_16--DRB1_13_05_01	0.077	2.2043
DRB1_04_16--DRB1_13_06	0.077	6.66667
DRB1_04_16--DRB1_13_10	0.077	5.03226
DRB1_04_16--DRB1_13_11_01	0.064	7.4086
DRB1_04_16--DRB1_13_12_01	0.064	6.29032
DRB1_04_16--DRB1_13_14_02	0.064	2.2043
DRB1_04_16--DRB1_13_17	0.071	1.49462
DRB1_04_16--DRB1_13_20	0.077	4.22581
DRB1_04_16--DRB1_13_26_01	0.077	1.01075
DRB1_04_16--DRB1_13_27	0.077	1.66071
DRB1_04_16--DRB1_13_36	0.077	7.75
DRB1_04_16--DRB1_14_01_01	0.09	1.57627
DRB1_04_16--DRB1_14_02_01	0.077	3.77419
DRB1_04_16--DRB1_14_03_01	0.077	1.03226
DRB1_04_16--DRB1_14_04_01	0.09	1.5914
DRB1_04_16--DRB1_14_05_01	0.084	2.11364
DRB1_04_16--DRB1_14_06_01	0.077	10.3441
DRB1_04_16--DRB1_14_07_01	0.084	93
DRB1_04_16--DRB1_14_08	0.084	2.11364
DRB1_04_16--DRB1_14_14	0.077	23.25
DRB1_04_16--DRB1_14_17	0.077	10.8925
DRB1_04_16--DRB1_14_21	0.077	9.36559
DRB1_04_16--DRB1_14_54_05	0.084	1.57627
DRB1_04_16--DRB1_15_01_01_01	0.071	1.2043
DRB1_04_16--DRB1_15_02_01_01	0.071	7.15385
DRB1_04_16--DRB1_15_03_01_02	0.071	1.41935
DRB1_04_16--DRB1_15_04	0.071	1.36559
DRB1_04_16--DRB1_16_01_01	0.071	2.26829
DRB1_04_16--DRB1_16_02_01_02	0.071	2.5914
DRB1_04_16--DRB1_16_03	0.078	2.26829
DRB1_04_16--DRB1_16_04	0.071	23.25
DRB1_04_16--DRB1_16_09_02	0.071	1.06897
DRB1_04_32--DRB1_04_92	0.006	19
DRB1_04_32--DRB1_07_01_01_02	0.077	2.03509
DRB1_04_32--DRB1_07_04	0.077	1.96552
DRB1_04_32--DRB1_08_01_01	0.071	1.84211
DRB1_04_32--DRB1_08_02_02	0.071	14.25
DRB1_04_32--DRB1_08_03_02	0.071	2.68421
DRB1_04_32--DRB1_08_04_01	0.071	1.94737
DRB1_04_32--DRB1_08_06	0.071	11.4035
DRB1_04_32--DRB1_08_07	0.071	7.125
DRB1_04_32--DRB1_08_09	0.084	14.25
DRB1_04_32--DRB1_08_11	0.071	6.33333
DRB1_04_32--DRB1_08_18	0.071	7.26316
DRB1_04_32--DRB1_09_01_10	0.064	1.09615
DRB1_04_32--DRB1_10_01_01_02	0.084	1.34211
DRB1_04_32--DRB1_11_01_08	0.071	1.79825
DRB1_04_32--DRB1_11_02_01	0.071	1.56164
DRB1_04_32--DRB1_11_03_01	0.071	1.58772
DRB1_04_32--DRB1_11_04_01	0.071	6.04386
DRB1_04_32--DRB1_11_05	0.071	2.13158
DRB1_04_32--DRB1_11_06_01	0.071	5.27193
DRB1_04_32--DRB1_11_08_02	0.071	5.00877
DRB1_04_32--DRB1_11_09	0.084	1.79825
DRB1_04_32--DRB1_11_11_01	0.071	11.4
DRB1_04_32--DRB1_11_12_01	0.078	1.79825
DRB1_04_32--DRB1_11_13_02	0.084	4.18421
DRB1_04_32--DRB1_11_14_01	0.071	6.33333
DRB1_04_32--DRB1_11_15	0.085	1.79825
DRB1_04_32--DRB1_11_19_01	0.071	1.7193
DRB1_04_32--DRB1_11_27_01	0.071	1.38596
DRB1_04_32--DRB1_11_32	0.071	1.44304
DRB1_04_32--DRB1_11_34	0.071	8.88596
DRB1_04_32--DRB1_12_01_01_02	0.099	8.09649
DRB1_04_32--DRB1_12_02_06	0.099	7.37719
DRB1_04_32--DRB1_12_06	0.092	8.09649
DRB1_04_32--DRB1_12_10	0.099	8.09649
DRB1_04_32--DRB1_13_01_13	0.078	1.56164
DRB1_04_32--DRB1_13_02_01	0.078	6.33333
DRB1_04_32--DRB1_13_03_01	0.064	3.32456
DRB1_04_32--DRB1_13_04	0.064	4.10526
DRB1_04_32--DRB1_13_05_01	0.078	1.79825
DRB1_04_32--DRB1_13_06	0.078	5.4386
DRB1_04_32--DRB1_13_10	0.078	4.10526
DRB1_04_32--DRB1_13_11_01	0.064	6.04386
DRB1_04_32--DRB1_13_12_01	0.064	5.13158
DRB1_04_32--DRB1_13_14_02	0.064	1.79825
DRB1_04_32--DRB1_13_17	0.071	1.2193
DRB1_04_32--DRB1_13_20	0.078	3.44737
DRB1_04_32--DRB1_13_26_01	0.078	1.21277
DRB1_04_32--DRB1_13_27	0.078	2.03571
DRB1_04_32--DRB1_13_36	0.078	9.5
DRB1_04_32--DRB1_14_01_01	0.091	1.9322
DRB1_04_32--DRB1_14_02_01	0.078	3.07895
DRB1_04_32--DRB1_14_03_01	0.078	1.1875
DRB1_04_32--DRB1_14_04_01	0.091	1.29825
DRB1_04_32--DRB1_14_05_01	0.084	2.59091
DRB1_04_32--DRB1_14_06_01	0.078	8.4386
DRB1_04_32--DRB1_14_07_01	0.084	114
DRB1_04_32--DRB1_14_08	0.084	2.59091
DRB1_04_32--DRB1_14_14	0.077	28.5
DRB1_04_32--DRB1_14_17	0.078	8.88596
DRB1_04_32--DRB1_14_21	0.078	7.64035
DRB1_04_32--DRB1_14_54_05	0.084	1.9322
DRB1_04_32--DRB1_15_01_01_01	0.072	1.01786
DRB1_04_32--DRB1_15_02_01_01	0.072	8.76923
DRB1_04_32--DRB1_15_03_01_02	0.072	1.15789
DRB1_04_32--DRB1_15_04	0.072	1.11404
DRB1_04_32--DRB1_16_01_01	0.072	2.78049
DRB1_04_32--DRB1_16_02_01_02	0.072	2.11404
DRB1_04_32--DRB1_16_03	0.072	2.78049
DRB1_04_32--DRB1_16_04	0.072	28.5
DRB1_04_32--DRB1_16_09_02	0.072	1.31034
DRB1_04_92--DRB1_07_01_01_02	0.071	38.6667
DRB1_04_92--DRB1_07_04	0.071	9.66667
DRB1_04_92--DRB1_08_01_01	0.064	35
DRB1_04_92--DRB1_08_02_02	0.064	1.33333
DRB1_04_92--DRB1_08_03_02	0.064	51
DRB1_04_92--DRB1_08_04_01	0.064	37
DRB1_04_92--DRB1_08_06	0.064	216.667
DRB1_04_92--DRB1_08_07	0.064	2.66667
DRB1_04_92--DRB1_08_09	0.077	1.33333
DRB1_04_92--DRB1_08_11	0.064	3
DRB1_04_92--DRB1_08_18	0.064	138
DRB1_04_92--DRB1_09_01_10	0.057	17.3333
DRB1_04_92--DRB1_10_01_01_02	0.078	25.5
DRB1_04_92--DRB1_11_01_08	0.065	34.1667
DRB1_04_92--DRB1_11_02_01	0.065	12.1667
DRB1_04_92--DRB1_11_03_01	0.065	30.1667
DRB1_04_92--DRB1_11_04_01	0.065	114.833
DRB1_04_92--DRB1_11_05	0.065	40.5
DRB1_04_92--DRB1_11_06_01	0.065	100.167
DRB1_04_92--DRB1_11_08_02	0.065	95.1667
DRB1_04_92--DRB1_11_09	0.078	34.1667
DRB1_04_92--DRB1_11_11_01	0.065	1.66667
DRB1_04_92--DRB1_11_12_01	0.071	34.1667
DRB1_04_92--DRB1_11_13_02	0.078	79.5
DRB1_04_92--DRB1_11_14_01	0.065	3
DRB1_04_92--DRB1_11_15	0.078	34.1667
DRB1_04_92--DRB1_11_19_01	0.065	32.6667
DRB1_04_92--DRB1_11_27_01	0.065	26.3333
DRB1_04_92--DRB1_11_32	0.065	13.1667
DRB1_04_92--DRB1_11_34	0.065	168.833
DRB1_04_92--DRB1_12_01_01_02	0.092	153.833
DRB1_04_92--DRB1_12_02_06	0.092	140.167
DRB1_04_92--DRB1_12_06	0.085	153.833
DRB1_04_92--DRB1_12_10	0.092	153.833
DRB1_04_92--DRB1_13_01_13	0.071	12.1667
DRB1_04_92--DRB1_13_02_01	0.071	3
DRB1_04_92--DRB1_13_03_01	0.058	63.1667
DRB1_04_92--DRB1_13_04	0.058	78
DRB1_04_92--DRB1_13_05_01	0.071	34.1667
DRB1_04_92--DRB1_13_06	0.071	103.333
DRB1_04_92--DRB1_13_10	0.071	78
DRB1_04_92--DRB1_13_11_01	0.058	114.833
DRB1_04_92--DRB1_13_12_01	0.058	97.5
DRB1_04_92--DRB1_13_14_02	0.058	34.1667
DRB1_04_92--DRB1_13_17	0.064	23.1667
DRB1_04_92--DRB1_13_20	0.071	65.5
DRB1_04_92--DRB1_13_26_01	0.071	15.6667
DRB1_04_92--DRB1_13_27	0.071	9.33333
DRB1_04_92--DRB1_13_36	0.071	2
DRB1_04_92--DRB1_14_01_01	0.084	9.83333
DRB1_04_92--DRB1_14_02_01	0.071	58.5
DRB1_04_92--DRB1_14_03_01	0.071	16
DRB1_04_92--DRB1_14_04_01	0.084	24.6667
DRB1_04_92--DRB1_14_05_01	0.077	7.33333
DRB1_04_92--DRB1_14_06_01	0.071	160.333
DRB1_04_92--DRB1_14_07_01	0.077	6
DRB1_04_92--DRB1_14_08	0.077	7.33333
DRB1_04_92--DRB1_14_14	0.071	1.5
DRB1_04_92--DRB1_14_17	0.071	168.833
DRB1_04_92--DRB1_14_21	0.071	145.167
DRB1_04_92--DRB1_14_54_05	0.077	9.83333
DRB1_04_92--DRB1_15_01_01_01	0.065	18.6667
DRB1_04_92--DRB1_15_02_01_01	0.065	2.16667
DRB1_04_92--DRB1_15_03_01_02	0.065	22
DRB1_04_92--DRB1_15_04	0.065	21.1667
DRB1_04_92--DRB1_16_01_01	0.065	6.83333
DRB1_04_92--DRB1_16_02_01_02	0.065	40.1667
DRB1_04_92--DRB1_16_03	0.072	6.83333
DRB1_04_92--DRB1_16_04	0.065	1.5
DRB1_04_92--DRB1_16_09_02	0.065	14.5
DRB1_07_01_01_02--DRB1_07_04	0	4
DRB1_07_01_01_02--DRB1_08_01_01	0.084	1.10476
DRB1_07_01_01_02--DRB1_08_02_02	0.084	29
DRB1_07_01_01_02--DRB1_08_03_02	0.084	1.31897
DRB1_07_01_01_02--DRB1_08_04_01	0.084	1.04505
DRB1_07_01_01_02--DRB1_08_06	0.084	5.60345
DRB1_07_01_01_02--DRB1_08_07	0.084	14.5
DRB1_07_01_01_02--DRB1_08_09	0.084	29
DRB1_07_01_01_02--DRB1_08_11	0.084	12.8889
DRB1_07_01_01_02--DRB1_08_18	0.084	3.56897
DRB1_07_01_01_02--DRB1_09_01_10	0.032	2.23077
DRB1_07_01_01_02--DRB1_10_01_01_02	0.103	1.51634
DRB1_07_01_01_02--DRB1_11_01_08	0.085	1.13171
DRB1_07_01_01_02--DRB1_11_02_01	0.085	3.17808
DRB1_07_01_01_02--DRB1_11_03_01	0.085	1.28177
DRB1_07_01_01_02--DRB1_11_04_01	0.085	2.96983
DRB1_07_01_01_02--DRB1_11_05	0.085	1.04741
DRB1_07_01_01_02--DRB1_11_06_01	0.085	2.59052
DRB1_07_01_01_02--DRB1_11_08_02	0.085	2.46121
DRB1_07_01_01_02--DRB1_11_09	0.093	1.13171
DRB1_07_01_01_02--DRB1_11_11_01	0.085	23.2
DRB1_07_01_01_02--DRB1_11_12_01	0.078	1.13171
DRB1_07_01_01_02--DRB1_11_13_02	0.084	2.05603
DRB1_07_01_01_02--DRB1_11_14_01	0.085	12.8889
DRB1_07_01_01_02--DRB1_11_15	0.093	1.13171
DRB1_07_01_01_02--DRB1_11_19_01	0.085	1.18367
DRB1_07_01_01_02--DRB1_11_27_01	0.085	1.46835
DRB1_07_01_01_02--DRB1_11_32	0.085	2.93671
DRB1_07_01_01_02--DRB1_11_34	0.085	4.36638
DRB1_07_01_01_02--DRB1_12_01_01_02	0.091	3.97845
DRB1_07_01_01_02--DRB1_12_02_06	0.091	3.625
DRB1_07_01_01_02--DRB1_12_06	0.084	3.97845
DRB1_07_01_01_02--DRB1_12_10	0.091	3.97845
DRB1_07_01_01_02--DRB1_13_01_13	0.086	3.17808
DRB1_07_01_01_02--DRB1_13_02_01	0.086	12.8889
DRB1_07_01_01_02--DRB1_13_03_01	0.078	1.63362
DRB1_07_01_01_02--DRB1_13_04	0.078	2.01724
DRB1_07_01_01_02--DRB1_13_05_01	0.086	1.13171
DRB1_07_01_01_02--DRB1_13_06	0.086	2.67241
DRB1_07_01_01_02--DRB1_13_10	0.086	2.01724
DRB1_07_01_01_02--DRB1_13_11_01	0.078	2.96983
DRB1_07_01_01_02--DRB1_13_12_01	0.078	2.52155
DRB1_07_01_01_02--DRB1_13_14_02	0.078	1.13171
DRB1_07_01_01_02--DRB1_13_17	0.084	1.66906
DRB1_07_01_01_02--DRB1_13_20	0.086	1.69397
DRB1_07_01_01_02--DRB1_13_26_01	0.086	2.46809
DRB1_07_01_01_02--DRB1_13_27	0.086	4.14286
DRB1_07_01_01_02--DRB1_13_36	0.086	19.3333
DRB1_07_01_01_02--DRB1_14_01_01	0.084	3.9322
DRB1_07_01_01_02--DRB1_14_02_01	0.086	1.51293
DRB1_07_01_01_02--DRB1_14_03_01	0.086	2.41667
DRB1_07_01_01_02--DRB1_14_04_01	0.084	1.56757
DRB1_07_01_01_02--DRB1_14_05_01	0.084	5.27273
DRB1_07_01_01_02--DRB1_14_06_01	0.086	4.14655
DRB1_07_01_01_02--DRB1_14_07_01	0.078	232
DRB1_07_01_01_02--DRB1_14_08	0.078	5.27273
DRB1_07_01_01_02--DRB1_14_14	0.078	58
DRB1_07_01_01_02--DRB1_14_17	0.086	4.36638
DRB1_07_01_01_02--DRB1_14_21	0.086	3.75431
DRB1_07_01_01_02--DRB1_14_54_05	0.078	3.9322
DRB1_07_01_01_02--DRB1_15_01_01_01	0.071	2.07143
DRB1_07_01_01_02--DRB1_15_02_01_01	0.071	17.8462
DRB1_07_01_01_02--DRB1_15_03_01_02	0.071	1.75758
DRB1_07_01_01_02--DRB1_15_04	0.071	1.82677
DRB1_07_01_01_02--DRB1_16_01_01	0.071	5.65854
DRB1_07_01_01_02--DRB1_16_02_01_02	0.071	1.03879
DRB1_07_01_01_02--DRB1_16_03	0.078	5.65854
DRB1_07_01_01_02--DRB1_16_04	0.071	58
DRB1_07_01_01_02--DRB1_16_09_02	0.071	2.66667
DRB1_07_04--DRB1_08_01_01	0.084	3.62069
DRB1_07_04--DRB1_08_02_02	0.084	7.25
DRB1_07_04--DRB1_08_03_02	0.084	5.27586
DRB1_07_04--DRB1_08_04_01	0.084	3.82759
DRB1_07_04--DRB1_08_06	0.084	22.4138
DRB1_07_04--DRB1_08_07	0.084	3.625
DRB1_07_04--DRB1_08_09	0.084	7.25
DRB1_07_04--DRB1_08_11	0.084	3.22222
DRB1_07_04--DRB1_08_18	0.084	14.2759
DRB1_07_04--DRB1_09_01_10	0.032	1.7931
DRB1_07_04--DRB1_10_01_01_02	0.103	2.63793
DRB1_07_04--DRB1_11_01_08	0.085	3.53448
DRB1_07_04--DRB1_11_02_01	0.085	1.25862
DRB1_07_04--DRB1_11_03_01	0.085	3.12069
DRB1_07_04--DRB1_11_04_01	0.085	11.8793
DRB1_07_04--DRB1_11_05	0.085	4.18966
DRB1_07_04--DRB1_11_06_01	0.085	10.3621
DRB1_07_04--DRB1_11_08_02	0.085	9.84483
DRB1_07_04--DRB1_11_09	0.093	3.53448
DRB1_07_04--DRB1_11_11_01	0.085	5.8
DRB1_07_04--DRB1_11_12_01	0.078	3.53448
DRB1_07_04--DRB1_11_13_02	0.084	8.22414
DRB1_07_04--DRB1_11_14_01	0.085	3.22222
DRB1_07_04--DRB1_11_15	0.093	3.53448
DRB1_07_04--DRB1_11_19_01	0.085	3.37931
DRB1_07_04--DRB1_11_27_01	0.085	2.72414
DRB1_07_04--DRB1_11_32	0.085	1.36207
DRB1_07_04--DRB1_11_34	0.085	17.4655
DRB1_07_04--DRB1_12_01_01_02	0.091	15.9138
DRB1_07_04--DRB1_12_02_06	0.091	14.5
DRB1_07_04--DRB1_12_06	0.084	15.9138
DRB1_07_04--DRB1_12_10	0.091	15.9138
DRB1_07_04--DRB1_13_01_13	0.086	1.25862
DRB1_07_04--DRB1_13_02_01	0.086	3.22222
DRB1_07_04--DRB1_13_03_01	0.078	6.53448
DRB1_07_04--DRB1_13_04	0.078	8.06897
DRB1_07_04--DRB1_13_05_01	0.086	3.53448
DRB1_07_04--DRB1_13_06	0.086	10.6897
DRB1_07_04--DRB1_13_10	0.086	8.06897
DRB1_07_04--DRB1_13_11_01	0.078	11.8793
DRB1_07_04--DRB1_13_12_01	0.078	10.0862
DRB1_07_04--DRB1_13_14_02	0.078	3.53448
DRB1_07_04--DRB1_13_17	0.084	2.39655
DRB1_07_04--DRB1_13_20	0.086	6.77586
DRB1_07_04--DRB1_13_26_01	0.086	1.62069
DRB1_07_04--DRB1_13_27	0.086	1.03571
DRB1_07_04--DRB1_13_36	0.086	4.83333
DRB1_07_04--DRB1_14_01_01	0.084	1.01724
DRB1_07_04--DRB1_14_02_01	0.086	6.05172
DRB1_07_04--DRB1_14_03_01	0.086	1.65517
DRB1_07_04--DRB1_14_04_01	0.084	2.55172
DRB1_07_04--DRB1_14_05_01	0.084	1.31818
DRB1_07_04--DRB1_14_06_01	0.086	16.5862
DRB1_07_04--DRB1_14_07_01	0.078	58
DRB1_07_04--DRB1_14_08	0.078	1.31818
DRB1_07_04--DRB1_14_14	0.078	14.5
DRB1_07_04--DRB1_14_17	0.086	17.4655
DRB1_07_04--DRB1_14_21	0.086	15.0172
DRB1_07_04--DRB1_14_54_05	0.078	1.01724
DRB1_07_04--DRB1_15_01_01_01	0.071	1.93103
DRB1_07_04--DRB1_15_02_01_01	0.071	4.46154
DRB1_07_04--DRB1_15_03_01_02	0.071	2.27586
DRB1_07_04--DRB1_15_04	0.071	2.18966
DRB1_07_04--DRB1_16_01_01	0.071	1.41463
DRB1_07_04--DRB1_16_02_01_02	0.071	4.15517
DRB1_07_04--DRB1_16_03	0.078	1.41463
DRB1_07_04--DRB1_16_04	0.071	14.5
DRB1_07_04--DRB1_16_09_02	0.071	1.5
DRB1_08_01_01--DRB1_08_02_02	0	26.25
DRB1_08_01_01--DRB1_08_03_02	0	1.45714
DRB1_08_01_01--DRB1_08_04_01	0	1.05714
DRB1_08_01_01--DRB1_08_06	0	6.19048
DRB1_08_01_01--DRB1_08_07	0	13.125
DRB1_08_01_01--DRB1_08_09	0.012	26.25
DRB1_08_01_01--DRB1_08_11	0	11.6667
DRB1_08_01_01--DRB1_08_18	0	3.94286
DRB1_08_01_01--DRB1_09_01_10	0.071	2.01923
DRB1_08_01_01--DRB1_10_01_01_02	0.078	1.37255
DRB1_08_01_01--DRB1_11_01_08	0.012	1.02439
DRB1_08_01_01--DRB1_11_02_01	0.012	2.87671
DRB1_08_01_01--DRB1_11_03_01	0.012	1.16022
DRB1_08_01_01--DRB1_11_04_01	0.012	3.28095
DRB1_08_01_01--DRB1_11_05	0.012	1.15714
DRB1_08_01_01--DRB1_11_06_01	0.012	2.8619
DRB1_08_01_01--DRB1_11_08_02	0.012	2.71905
DRB1_08_01_01--DRB1_11_09	0.025	1.02439
DRB1_08_01_01--DRB1_11_11_01	0.012	21
DRB1_08_01_01--DRB1_11_12_01	0.019	1.02439
DRB1_08_01_01--DRB1_11_13_02	0.025	2.27143
DRB1_08_01_01--DRB1_11_14_01	0.012	11.6667
DRB1_08_01_01--DRB1_11_15	0.025	1.02439
DRB1_08_01_01--DRB1_11_19_01	0.012	1.07143
DRB1_08_01_01--DRB1_11_27_01	0.012	1.32911
DRB1_08_01_01--DRB1_11_32	0.012	2.65823
DRB1_08_01_01--DRB1_11_34	0.012	4.82381
DRB1_08_01_01--DRB1_12_01_01_02	0.025	4.39524
DRB1_08_01_01--DRB1_12_02_06	0.025	4.00476
DRB1_08_01_01--DRB1_12_06	0.032	4.39524
DRB1_08_01_01--DRB1_12_10	0.025	4.39524
DRB1_08_01_01--DRB1_13_01_13	0.019	2.87671
DRB1_08_01_01--DRB1_13_02_01	0.019	11.6667
DRB1_08_01_01--DRB1_13_03_01	0.006	1.80476
DRB1_08_01_01--DRB1_13_04	0.006	2.22857
DRB1_08_01_01--DRB1_13_05_01	0.019	1.02439
DRB1_08_01_01--DRB1_13_06	0.019	2.95238
DRB1_08_01_01--DRB1_13_10	0.019	2.22857
DRB1_08_01_01--DRB1_13_11_01	0.006	3.28095
DRB1_08_01_01--DRB1_13_12_01	0.006	2.78571
DRB1_08_01_01--DRB1_13_14_02	0.006	1.02439
DRB1_08_01_01--DRB1_13_17	0	1.51079
DRB1_08_01_01--DRB1_13_20	0.019	1.87143
DRB1_08_01_01--DRB1_13_26_01	0.019	2.23404
DRB1_08_01_01--DRB1_13_27	0.019	3.75
DRB1_08_01_01--DRB1_13_36	0.019	17.5
DRB1_08_01_01--DRB1_14_01_01	0.031	3.55932
DRB1_08_01_01--DRB1_14_02_01	0.019	1.67143
DRB1_08_01_01--DRB1_14_03_01	0.019	2.1875
DRB1_08_01_01--DRB1_14_04_01	0.019	1.41892
DRB1_08_01_01--DRB1_14_05_01	0.019	4.77273
DRB1_08_01_01--DRB1_14_06_01	0.019	4.58095
DRB1_08_01_01--DRB1_14_07_01	0.025	210
DRB1_08_01_01--DRB1_14_08	0.025	4.77273
DRB1_08_01_01--DRB1_14_14	0.019	52.5
DRB1_08_01_01--DRB1_14_17	0.019	4.82381
DRB1_08_01_01--DRB1_14_21	0.019	4.14762
DRB1_08_01_01--DRB1_14_54_05	0.025	3.55932
DRB1_08_01_01--DRB1_15_01_01_01	0.058	1.875
DRB1_08_01_01--DRB1_15_02_01_01	0.058	16.1538
DRB1_08_01_01--DRB1_15_03_01_02	0.058	1.59091
DRB1_08_01_01--DRB1_15_04	0.058	1.65354
DRB1_08_01_01--DRB1_16_01_01	0.058	5.12195
DRB1_08_01_01--DRB1_16_02_01_02	0.058	1.14762
DRB1_08_01_01--DRB1_16_03	0.065	5.12195
DRB1_08_01_01--DRB1_16_04	0.058	52.5
DRB1_08_01_01--DRB1_16_09_02	0.058	2.41379
DRB1_08_02_02--DRB1_08_03_02	0	38.25
DRB1_08_02_02--DRB1_08_04_01	0	27.75
DRB1_08_02_02--DRB1_08_06	0	162.5
DRB1_08_02_02--DRB1_08_07	0	2
DRB1_08_02_02--DRB1_08_09	0.012	1
DRB1_08_02_02--DRB1_08_11	0	2.25
DRB1_08_02_02--DRB1_08_18	0	103.5
DRB1_08_02_02--DRB1_09_01_10	0.071	13
DRB1_08_02_02--DRB1_10_01_01_02	0.078	19.125
DRB1_08_02_02--DRB1_11_01_08	0.012	25.625
DRB1_08_02_02--DRB1_11_02_01	0.012	9.125
DRB1_08_02_02--DRB1_11_03_01	0.012	22.625
DRB1_08_02_02--DRB1_11_04_01	0.012	86.125
DRB1_08_02_02--DRB1_11_05	0.012	30.375
DRB1_08_02_02--DRB1_11_06_01	0.012	75.125
DRB1_08_02_02--DRB1_11_08_02	0.012	71.375
DRB1_08_02_02--DRB1_11_09	0.025	25.625
DRB1_08_02_02--DRB1_11_11_01	0.012	1.25
DRB1_08_02_02--DRB1_11_12_01	0.019	25.625
DRB1_08_02_02--DRB1_11_13_02	0.025	59.625
DRB1_08_02_02--DRB1_11_14_01	0.012	2.25
DRB1_08_02_02--DRB1_11_15	0.025	25.625
DRB1_08_02_02--DRB1_11_19_01	0.012	24.5
[truncated: 2,188 more rows]

## Sheet: Figure S1
Range	Epitope count
14-16	745
16-18	379
18-20	1320
20-22	73
22-24	41
24-26	75
26-28	21
28-30	12
30-32	9
32-34	6
34-36	6
36-38	0
38-40	1
40-42	1
42-44	0
44-46	2

## Sheet: Figure S2
Allele	Fraction of epitopes bound
DRB10806	0.483092
DRB10102	0.465255
DRB11203	0.36269
DRB11406	0.357488
DRB11201	0.342995
DRB11210	0.342995
DRB11202	0.312523
DRB10818	0.307692
DRB10101	0.296172
DRB10107	0.296172
DRB11104	0.256039
DRB11106	0.223337
DRB11312	0.217391
DRB11304	0.173913
DRB11303	0.14084
DRB10410	0.137867
DRB11402	0.130435
DRB11409	0.120401
DRB10803	0.113712
DRB10103	0.0910442
DRB11602	0.0895578
DRB10701	0.0862133
DRB10804	0.0824972
DRB10801	0.0780379
DRB11101	0.0761799
DRB11109	0.0761799
DRB11112	0.0761799
DRB11305	0.0761799
DRB11103	0.0672612
DRB11425	0.0605723
DRB11001	0.0568562
DRB11404	0.0549981
DRB11503	0.0490524
DRB11504	0.0471944
DRB10412	0.0464511
DRB10405	0.0442215
DRB10404	0.0423634
DRB11501	0.0416202
DRB11506	0.0416202
DRB10901	0.0386473
DRB11403	0.0356745
DRB10401	0.0345596
DRB11102	0.0271275
DRB11301	0.0271275
DRB10408	0.0245262
DRB11401	0.0219249
DRB11454	0.0219249
DRB10411	0.0200669
DRB11605	0.0196953
DRB10301	0.0185805
DRB11405	0.0163508
DRB11408	0.0163508
DRB11601	0.015236
DRB10811	0.00668896
DRB11302	0.00668896
DRB10807	0.00594575
DRB11502	0.00483092
DRB10403	0.0040877
DRB10406	0.0040877
DRB10802	0.00297287
DRB10302	0.00260126
DRB10407	0.00222965
DRB10402	0.000743218
DRB11407	0.000371609
DRB11410	0

## Sheet: Figure S3
Allele	Promiscuity (using measured affinity of 216 epitopes)	Promiscuity (using predicted affinity of 2665 epitopes)
HLA-DRB1*01:01	2.58101	2.86499
HLA-DRB1*03:01	-1.0237	-0.536925
HLA-DRB1*04:01	0.316101	-0.343582
HLA-DRB1*04:04	-0.417601	-0.24691
HLA-DRB1*04:05	0.284201	-0.228496
HLA-DRB1*07:01	0.635101	0.291689
HLA-DRB1*08:02	-0.959902	-0.730268
HLA-DRB1*09:01	-0.258101	-0.292944
HLA-DRB1*11:01	-0.1305	0.167397
HLA-DRB1*13:02	-0.513301	-0.688837
HLA-DRB1*15:01	-0.513301	-0.256117

## Sheet: Figure S4
	Panel A		Panel B		Panel C		Panel D		Panel E
Allele	Promiscuity (50 nM binding threshold)	Promiscuity (500 nM binding threshold)	Promiscuity (50 nM binding threshold)	Promiscuity (1000 nM binding threshold)	Promiscuity (500 nM binding threshold)	Promiscuity (1000 nM binding threshold)	Promiscuity (NetMHCIIpan - 50 nM)	Promiscuity (MHC2SKpan - 50 nM)	Pomiscuity (epitopes of IC pathogens	Pomiscuity (epitopes of EC pathogens
DRB1*01:01	0.296172	0.708658	0.296172	0.805277	0.708658	0.805277	0.296172	0.190264	0.262951	0.289655
DRB1*01:02	0.465255	0.820884	0.465255	0.887774	0.820884	0.887774	0.465255	0.227053	0.436421	0.503448
DRB1*01:03	0.0910442	0.597176	0.0910442	0.746563	0.597176	0.746563	0.0910442	0.0947603	0.0572998	0.0275862
DRB1*01:07	0.296172	0.708658	0.296172	0.805277	0.708658	0.805277	0.296172	0.190264	0.262951	0.289655
DRB1*01:18	0.307692	0.703828	0.307692	0.804162	0.703828	0.804162	0.307692	0.186176	0.279435	0.310345
DRB1*01:20	0.456336	0.813081	0.456336	0.8822	0.813081	0.8822	0.456336	0.251579	0.427002	0.462069
DRB1*03:01	0.0185805	0.257525	0.0185805	0.411	0.257525	0.411	0.0185805	0.00891862	0.0211931	0.00689655
DRB1*03:02	0.00260126	0.154589	0.00260126	0.322557	0.154589	0.322557	0.00260126	0.00111483	0.00392465	0
DRB1*03:03	0.0367893	0.361576	0.0367893	0.50799	0.361576	0.50799	0.0367893	0.0193237	0.0376766	0.0413793
DRB1*03:05	0.000743218	0.134522	0.000743218	0.278335	0.134522	0.278335	0.000743218	0	0	0
DRB1*03:06	0.0130063	0.283166	0.0130063	0.454478	0.283166	0.454478	0.0130063	0.00780379	0.0117739	0
DRB1*03:07	0.0293571	0.319212	0.0293571	0.458937	0.319212	0.458937	0.0293571	0.0118915	0.0306122	0.0344828
DRB1*03:08	0.0185805	0.257525	0.0185805	0.411	0.257525	0.411	0.0185805	0.00891862	0.0211931	0.00689655
DRB1*03:11	0.0483092	0.384615	0.0483092	0.530658	0.384615	0.530658	0.0483092	0.0115199	0.0455259	0.0551724
DRB1*03:14	0.00185805	0.213675	0.00185805	0.424378	0.213675	0.424378	0.00185805	0.00260126	0.000784929	0
DRB1*03:15	0.0230398	0.365663	0.0230398	0.53586	0.365663	0.53586	0.0230398	0.0282423	0.0266876	0.0206897
DRB1*03:17	0.00334448	0.20327	0.00334448	0.380899	0.20327	0.380899	0.00334448	0.000743218	0.00470958	0
DRB1*03:18	0.0185805	0.257525	0.0185805	0.411	0.257525	0.411	0.0185805	0.00891862	0.0211931	0.00689655
DRB1*03:19	0.00371609	0.142698	0.00371609	0.258268	0.142698	0.258268	0.00371609	0.00445931	0.00392465	0
DRB1*03:21	0.0293571	0.319212	0.0293571	0.458937	0.319212	0.458937	0.0293571	0.0118915	0.0306122	0.0344828
DRB1*03:38	0.00222965	0.160535	0.00222965	0.317726	0.160535	0.317726	0.00222965	0.000743218	0.00313972	0
DRB1*04:01	0.0345596	0.400966	0.0345596	0.573393	0.400966	0.573393	0.0345596	0.0222965	0.0188383	0.0344828
DRB1*04:02	0.000743218	0.159049	0.000743218	0.34188	0.159049	0.34188	0.000743218	0.0081754	0	0
DRB1*04:03	0.0040877	0.219249	0.0040877	0.399108	0.219249	0.399108	0.0040877	0.00334448	0.00235479	0
DRB1*04:04	0.0423634	0.411	0.0423634	0.573021	0.411	0.573021	0.0423634	0.0327016	0.033752	0.0413793
DRB1*04:05	0.0442215	0.4411	0.0442215	0.600149	0.4411	0.600149	0.0442215	0.0234114	0.0313972	0.0413793
DRB1*04:06	0.0040877	0.219249	0.0040877	0.399108	0.219249	0.399108	0.0040877	0.00334448	0.00235479	0
DRB1*04:07	0.00222965	0.186919	0.00222965	0.356002	0.186919	0.356002	0.00222965	0.00111483	0.00156986	0
DRB1*04:08	0.0245262	0.329989	0.0245262	0.499814	0.329989	0.499814	0.0245262	0.0130063	0.0149137	0.0275862
DRB1*04:10	0.137867	0.606094	0.137867	0.734299	0.606094	0.734299	0.137867	0.0795243	0.120879	0.213793
DRB1*04:11	0.0200669	0.393906	0.0200669	0.574136	0.393906	0.574136	0.0200669	0.0178372	0.0172684	0.0137931
DRB1*04:12	0.0464511	0.513564	0.0464511	0.686734	0.513564	0.686734	0.0464511	0.0631735	0.0361068	0.0275862
DRB1*04:13	0.06466	0.517651	0.06466	0.684132	0.517651	0.684132	0.06466	0.0464511	0.044741	0.0551724
DRB1*04:14	0	0.0876997	0	0.233371	0.0876997	0.233371	0	0.00111483	0	0
DRB1*04:15	0.0211817	0.398365	0.0211817	0.573021	0.398365	0.573021	0.0211817	0.0438499	0.0149137	0
DRB1*04:16	0.0345596	0.400966	0.0345596	0.573393	0.400966	0.573393	0.0345596	0.0222965	0.0188383	0.0344828
DRB1*04:24	0.0107767	0.26087	0.0107767	0.425121	0.26087	0.425121	0.0107767	0.017094	0.00470958	0.0137931
DRB1*04:34	0.0761799	0.548495	0.0761799	0.714604	0.548495	0.714604	0.0761799	0.0401338	0.05573	0.0758621
DRB1*04:36	0.0211817	0.398365	0.0211817	0.573021	0.398365	0.573021	0.0211817	0.0438499	0.0149137	0
DRB1*04:37	0.00929023	0.318841	0.00929023	0.522482	0.318841	0.522482	0.00929023	0.017094	0.00549451	0
DRB1*04:38	0.00631735	0.257153	0.00631735	0.445559	0.257153	0.445559	0.00631735	0.0111483	0.00235479	0
DRB1*07:01	0.0862133	0.514679	0.0862133	0.672241	0.514679	0.672241	0.0862133	0.0575994	0.0729984	0.103448
DRB1*07:04	0.0215533	0.325901	0.0215533	0.478633	0.325901	0.478633	0.0215533	0.00631735	0.0204082	0.0206897
DRB1*08:01	0.0780379	0.527685	0.0780379	0.706429	0.527685	0.706429	0.0780379	0.0602007	0.0832025	0.0896552
DRB1*08:02	0.00297287	0.146786	0.00297287	0.324415	0.146786	0.324415	0.00297287	0.0163508	0.00392465	0
DRB1*08:03	0.113712	0.582311	0.113712	0.738016	0.582311	0.738016	0.113712	0.0709773	0.113815	0.137931
DRB1*08:04	0.0824972	0.483463	0.0824972	0.6466	0.483463	0.6466	0.0824972	0.143069	0.0824176	0.0689655
DRB1*08:05	0.294686	0.762542	0.294686	0.854329	0.762542	0.854329	0.294686	0.135637	0.298273	0.337931
DRB1*08:06	0.483092	0.846154	0.483092	0.899666	0.846154	0.899666	0.483092	0.344853	0.476452	0.537931
DRB1*08:07	0.00594575	0.219249	0.00594575	0.409513	0.219249	0.409513	0.00594575	0.00557414	0.00784929	0
DRB1*08:08	0.00668896	0.256039	0.00668896	0.468971	0.256039	0.468971	0.00668896	0.0193237	0.00784929	0
DRB1*08:09	0.00297287	0.146786	0.00297287	0.324415	0.146786	0.324415	0.00297287	0.0163508	0.00392465	0
DRB1*08:10	0.512077	0.857302	0.512077	0.904497	0.857302	0.904497	0.512077	0.356373	0.50471	0.565517
DRB1*08:11	0.00668896	0.256039	0.00668896	0.468971	0.256039	0.468971	0.00668896	0.0327016	0.00784929	0
DRB1*08:12	0.473802	0.835006	0.473802	0.89372	0.835006	0.89372	0.473802	0.308436	0.465463	0.551724
DRB1*08:18	0.307692	0.785582	0.307692	0.874396	0.785582	0.874396	0.307692	0.145671	0.312402	0.386207
DRB1*09:01	0.0386473	0.446302	0.0386473	0.638424	0.446302	0.638424	0.0386473	0.0434783	0.0259027	0.0137931
DRB1*09:02	0.0442215	0.452991	0.0442215	0.653289	0.452991	0.653289	0.0442215	0.0434783	0.0290424	0.0275862
DRB1*10:01	0.0568562	0.40654	0.0568562	0.568933	0.40654	0.568933	0.0568562	0.0947603	0.0416013	0.0482759
DRB1*11:01	0.0761799	0.403567	0.0761799	0.548495	0.403567	0.548495	0.0761799	0.0594575	0.0792779	0.110345
DRB1*11:02	0.0271275	0.422148	0.0271275	0.598291	0.422148	0.598291	0.0271275	0.073207	0.0196232	0.0275862
DRB1*11:03	0.0672612	0.562988	0.0672612	0.721665	0.562988	0.721665	0.0672612	0.083612	0.0541601	0.0551724
DRB1*11:04	0.256039	0.645485	0.256039	0.749907	0.645485	0.749907	0.256039	0.185061	0.255887	0.317241
DRB1*11:05	0.090301	0.466369	0.090301	0.610182	0.466369	0.610182	0.090301	0.0620587	0.0902669	0.117241
DRB1*11:06	0.223337	0.593088	0.223337	0.703828	0.593088	0.703828	0.223337	0.163136	0.216641	0.296552
DRB1*11:08	0.212189	0.62579	0.212189	0.742846	0.62579	0.742846	0.212189	0.0865849	0.214286	0.289655
DRB1*11:09	0.0761799	0.403567	0.0761799	0.548495	0.403567	0.548495	0.0761799	0.0594575	0.0792779	0.110345
DRB1*11:10	0.0761799	0.403567	0.0761799	0.548495	0.403567	0.548495	0.0761799	0.0594575	0.0792779	0.110345
DRB1*11:11	0.00371609	0.324043	0.00371609	0.552583	0.324043	0.552583	0.00371609	0.0081754	0.000784929	0
DRB1*11:12	0.0761799	0.403567	0.0761799	0.548495	0.403567	0.548495	0.0761799	0.0594575	0.0792779	0.110345
DRB1*11:13	0.177258	0.571535	0.177258	0.690821	0.571535	0.690821	0.177258	0.136752	0.169545	0.262069
DRB1*11:14	0.00668896	0.263099	0.00668896	0.449275	0.263099	0.449275	0.00668896	0.00743218	0.000784929	0
DRB1*11:15	0.0761799	0.403567	0.0761799	0.548495	0.403567	0.548495	0.0761799	0.0594575	0.0792779	0.110345
DRB1*11:16	0.0271275	0.422148	0.0271275	0.598291	0.422148	0.598291	0.0271275	0.073207	0.0196232	0.0275862
DRB1*11:19	0.0728354	0.435526	0.0728354	0.588629	0.435526	0.588629	0.0728354	0.0628019	0.0722135	0.0896552
DRB1*11:27	0.0587142	0.367521	0.0587142	0.513935	0.367521	0.513935	0.0587142	0.0156076	0.066719	0.0965517
DRB1*11:30	0.0215533	0.322557	0.0215533	0.477518	0.322557	0.477518	0.0215533	0.0345596	0.0188383	0.0137931
DRB1*11:32	0.0293571	0.260126	0.0293571	0.410256	0.260126	0.410256	0.0293571	0.0274991	0.0353218	0.0344828
DRB1*11:34	0.37644	0.75288	0.37644	0.846897	0.75288	0.846897	0.37644	0.162765	0.379121	0.455172
DRB1*11:37	0.0382757	0.358603	0.0382757	0.526942	0.358603	0.526942	0.0382757	0.0572278	0.043956	0.0482759
DRB1*11:41	0.0460795	0.578967	0.0460795	0.748792	0.578967	0.748792	0.0460795	0.0787811	0.0345369	0.0413793
DRB1*11:42	0.424006	0.798959	0.424006	0.873653	0.798959	0.873653	0.424006	0.219993	0.428571	0.503448
DRB1*11:43	0.256039	0.645485	0.256039	0.749907	0.645485	0.749907	0.256039	0.185061	0.255887	0.317241
DRB1*11:68	0.023783	0.404682	0.023783	0.592345	0.404682	0.592345	0.023783	0.0163508	0.0188383	0.00689655
DRB1*12:01	0.342995	0.687105	0.342995	0.777778	0.687105	0.777778	0.342995	0.232999	0.349294	0.434483
DRB1*12:02	0.312523	0.662207	0.312523	0.760312	0.662207	0.760312	0.312523	0.228911	0.316327	0.413793
DRB1*12:03	0.36269	0.704571	0.36269	0.793757	0.704571	0.793757	0.36269	0.255295	0.366562	0.455172
DRB1*12:04	0.25641	0.640282	0.25641	0.748421	0.640282	0.748421	0.25641	0.227796	0.252747	0.324138
DRB1*12:05	0.342995	0.687105	0.342995	0.777778	0.687105	0.777778	0.342995	0.232999	0.349294	0.434483
DRB1*12:06	0.342995	0.687105	0.342995	0.777778	0.687105	0.777778	0.342995	0.232999	0.349294	0.434483
DRB1*12:08	0.373096	0.723151	0.373096	0.813824	0.723151	0.813824	0.373096	0.224823	0.374411	0.462069
DRB1*12:10	0.342995	0.687105	0.342995	0.777778	0.687105	0.777778	0.342995	0.232999	0.349294	0.434483
DRB1*12:17	0.342995	0.687105	0.342995	0.777778	0.687105	0.777778	0.342995	0.232999	0.349294	0.434483
DRB1*13:01	0.0271275	0.422148	0.0271275	0.598291	0.422148	0.598291	0.0271275	0.073207	0.0196232	0.0275862
DRB1*13:02	0.00668896	0.263099	0.00668896	0.449275	0.263099	0.449275	0.00668896	0.00743218	0.000784929	0
DRB1*13:03	0.14084	0.70903	0.14084	0.837235	0.70903	0.837235	0.14084	0.149387	0.134223	0.165517
DRB1*13:04	0.173913	0.713861	0.173913	0.827202	0.713861	0.827202	0.173913	0.202899	0.152276	0.262069
DRB1*13:05	0.0761799	0.403567	0.0761799	0.548495	0.403567	0.548495	0.0761799	0.0594575	0.0792779	0.110345
DRB1*13:06	0.230398	0.649944	0.230398	0.758454	0.649944	0.758454	0.230398	0.182832	0.222135	0.337931
DRB1*13:07	0.0382757	0.358603	0.0382757	0.526942	0.358603	0.526942	0.0382757	0.0572278	0.043956	0.0482759
DRB1*13:09	0.0865849	0.57971	0.0865849	0.744333	0.57971	0.744333	0.0865849	0.0798959	0.0729984	0.0965517
DRB1*13:10	0.123374	0.669268	0.123374	0.804534	0.669268	0.804534	0.123374	0.197696	0.11303	0.144828
DRB1*13:11	0.256039	0.645485	0.256039	0.749907	0.645485	0.749907	0.256039	0.185061	0.255887	0.317241
DRB1*13:12	0.217391	0.716834	0.217391	0.830175	0.716834	0.830175	0.217391	0.131178	0.211146	0.317241
DRB1*13:14	0.0761799	0.403567	0.0761799	0.548495	0.403567	0.548495	0.0761799	0.0594575	0.0792779	0.110345
DRB1*13:17	0.0516537	0.5589	0.0516537	0.725009	0.5589	0.725009	0.0516537	0.0977332	0.0400314	0.0344828
DRB1*13:18	0.090301	0.409142	0.090301	0.555184	0.409142	0.555184	0.090301	0.114827	0.0894819	0.110345
DRB1*13:20	0.146042	0.612783	0.146042	0.751765	0.612783	0.751765	0.146042	0.101449	0.131083	0.206897
DRB1*13:21	0.318097	0.727239	0.318097	0.821628	0.727239	0.821628	0.318097	0.131178	0.323391	0.365517
DRB1*13:22	0.0271275	0.422148	0.0271275	0.598291	0.422148	0.598291	0.0271275	0.073207	0.0196232	0.0275862
DRB1*13:23	0.00668896	0.263099	0.00668896	0.449275	0.263099	0.449275	0.00668896	0.00743218	0.000784929	0
DRB1*13:26	0.0349313	0.301003	0.0349313	0.450019	0.301003	0.450019	0.0349313	0.073207	0.0416013	0.0413793
DRB1*13:27	0.0208101	0.44333	0.0208101	0.630992	0.44333	0.630992	0.0208101	0.0505388	0.0164835	0.0137931
DRB1*13:29	0.023783	0.404682	0.023783	0.592345	0.404682	0.592345	0.023783	0.0163508	0.0188383	0.00689655
DRB1*13:31	0.00222965	0.198811	0.00222965	0.388703	0.198811	0.388703	0.00222965	0.00297287	0	0
DRB1*13:34	0.00668896	0.263099	0.00668896	0.449275	0.263099	0.449275	0.00668896	0.00743218	0.000784929	0
DRB1*13:36	0.00445931	0.242289	0.00445931	0.451877	0.242289	0.451877	0.00445931	0.00743218	0	0
DRB1*13:37	0.0148644	0.400223	0.0148644	0.607581	0.400223	0.607581	0.0148644	0.0598291	0.0117739	0.00689655
DRB1*13:39	0.00668896	0.263099	0.00668896	0.449275	0.263099	0.449275	0.00668896	0.00891862	0.000784929	0
DRB1*13:42	0.256039	0.645485	0.256039	0.749907	0.645485	0.749907	0.256039	0.185061	0.255887	0.317241
DRB1*13:49	0.242289	0.707915	0.242289	0.818283	0.707915	0.818283	0.242289	0.126719	0.240973	0.303448
DRB1*13:67	0.00557414	0.244147	0.00557414	0.437384	0.244147	0.437384	0.00557414	0.00483092	0.000784929	0
DRB1*13:83	0.0271275	0.422148	0.0271275	0.598291	0.422148	0.598291	0.0271275	0.073207	0.0196232	0.0275862
DRB1*14:01	0.0219249	0.305834	0.0219249	0.466741	0.305834	0.466741	0.0219249	0.0553698	0.0188383	0.0137931
DRB1*14:02	0.130435	0.503159	0.130435	0.634337	0.503159	0.634337	0.130435	0.0880713	0.134223	0.172414
DRB1*14:03	0.0356745	0.237458	0.0356745	0.365292	0.237458	0.365292	0.0356745	0.0486808	0.0416013	0.0344828
DRB1*14:04	0.0549981	0.435897	0.0549981	0.599034	0.435897	0.599034	0.0549981	0.0698625	0.0525903	0.0482759
DRB1*14:05	0.0163508	0.248978	0.0163508	0.409513	0.248978	0.409513	0.0163508	0.0449647	0.0188383	0.0137931
DRB1*14:06	0.357488	0.734671	0.357488	0.827945	0.734671	0.827945	0.357488	0.199554	0.357143	0.434483
DRB1*14:07	0.000371609	0.134151	0.000371609	0.291341	0.134151	0.291341	0.000371609	0.00371609	0.000784929	0
DRB1*14:08	0.0163508	0.248978	0.0163508	0.409513	0.248978	0.409513	0.0163508	0.0267559	0.0188383	0.0137931
DRB1*14:09	0.120401	0.54032	0.120401	0.693423	0.54032	0.693423	0.120401	0.0568562	0.120879	0.151724
DRB1*14:10	0	0.0568562	0	0.160907	0.0568562	0.160907	0	0.00260126	0	0
DRB1*14:12	0.187291	0.535117	0.187291	0.645113	0.535117	0.645113	0.187291	0.172427	0.184458	0.248276
DRB1*14:13	0.398737	0.790041	0.398737	0.870308	0.790041	0.870308	0.398737	0.169454	0.402669	0.482759
DRB1*14:14	0.00148644	0.128205	0.00148644	0.27016	0.128205	0.27016	0.00148644	0.00520253	0.00156986	0
DRB1*14:15	0.0824972	0.483463	0.0824972	0.6466	0.483463	0.6466	0.0824972	0.143069	0.0824176	0.0689655
DRB1*14:17	0.37644	0.75288	0.37644	0.846897	0.75288	0.846897	0.37644	0.162765	0.379121	0.455172
DRB1*14:18	0.0234114	0.220364	0.0234114	0.359346	0.220364	0.359346	0.0234114	0.0676329	0.0259027	0.0206897
DRB1*14:19	0.0955035	0.53586	0.0955035	0.696024	0.53586	0.696024	0.0955035	0.098848	0.0941915	0.103448
DRB1*14:21	0.323671	0.761799	0.323671	0.846897	0.761799	0.846897	0.323671	0.185061	0.312402	0.434483
DRB1*14:22	0.0605723	0.480119	0.0605723	0.645113	0.480119	0.645113	0.0605723	0.056113	0.0604396	0.0896552
DRB1*14:25	0.0605723	0.480119	0.0605723	0.645113	0.480119	0.645113	0.0605723	0.056113	0.0604396	0.0896552
DRB1*14:39	0.0159792	0.265329	0.0159792	0.411743	0.265329	0.411743	0.0159792	0.025641	0.0156986	0.00689655
DRB1*14:43	0.0163508	0.240431	0.0163508	0.400595	0.240431	0.400595	0.0163508	0.0301003	0.0180534	0.0137931
DRB1*14:54	0.0219249	0.305834	0.0219249	0.466741	0.305834	0.466741	0.0219249	0.0553698	0.0188383	0.0137931
DRB1*15:01	0.0416202	0.406912	0.0416202	0.554441	0.406912	0.554441	0.0416202	0.0401338	0.0368917	0.0275862
DRB1*15:02	0.00483092	0.250836	0.00483092	0.431067	0.250836	0.431067	0.00483092	0.0100334	0.00392465	0.00689655
DRB1*15:03	0.0490524	0.414716	0.0490524	0.561873	0.414716	0.561873	0.0490524	0.0460795	0.043956	0.0482759
DRB1*15:04	0.0471944	0.426979	0.0471944	0.590487	0.426979	0.590487	0.0471944	0.0460795	0.0463108	0.0827586
DRB1*15:05	0.158305	0.543292	0.158305	0.657005	0.543292	0.657005	0.158305	0.0587142	0.163265	0.193103
DRB1*15:06	0.0416202	0.406912	0.0416202	0.554441	0.406912	0.554441	0.0416202	0.0401338	0.0368917	0.0275862
DRB1*15:09	0.0416202	0.406912	0.0416202	0.554441	0.406912	0.554441	0.0416202	0.0401338	0.0368917	0.0275862
DRB1*15:10	0.0174656	0.330732	0.0174656	0.488294	0.330732	0.488294	0.0174656	0.0319584	0.0133438	0
DRB1*15:11	0.00185805	0.238573	0.00185805	0.437012	0.238573	0.437012	0.00185805	0.00966184	0.00235479	0
DRB1*16:01	0.015236	0.250093	0.015236	0.394649	0.250093	0.394649	0.015236	0.0327016	0.0172684	0.0206897
DRB1*16:02	0.0895578	0.455221	0.0895578	0.603121	0.455221	0.603121	0.0895578	0.0557414	0.101256	0.124138
DRB1*16:03	0.015236	0.250093	0.015236	0.394649	0.250093	0.394649	0.015236	0.0327016	0.0172684	0.0206897
DRB1*16:04	0.00148644	0.081754	0.00148644	0.198068	0.081754	0.198068	0.00148644	0.00520253	0.00235479	0
DRB1*16:05	0.0196953	0.27722	0.0196953	0.425864	0.27722	0.425864	0.0196953	0.0349313	0.0204082	0.0275862
DRB1*16:09	0.03233	0.293943	0.03233	0.426607	0.293943	0.426607	0.03233	0.0356745	0.0376766	0.0551724
DRB1*16:15	0.0992196	0.474545	0.0992196	0.597547	0.474545	0.597547	0.0992196	0.114827	0.10675	0.110345

## Sheet: Figure S5
Allele	Promiscuity	Number of recognized species
DRB1*01:01	0.296172	58
DRB1*01:02	0.465255	64
DRB1*01:03	0.0910442	43
DRB1*01:07	0.296172	58
DRB1*01:18	0.307692	59
DRB1*01:20	0.456336	64
DRB1*03:01	0.0185805	21
DRB1*03:02	0.00260126	7
DRB1*03:03	0.0367893	34
DRB1*03:05	0.000743218	2
DRB1*03:06	0.0130063	17
DRB1*03:07	0.0293571	29
DRB1*03:08	0.0185805	21
DRB1*03:11	0.0483092	38
DRB1*03:14	0.00185805	4
DRB1*03:15	0.0230398	29
DRB1*03:17	0.00334448	7
DRB1*03:18	0.0185805	21
DRB1*03:19	0.00371609	8
DRB1*03:21	0.0293571	29
DRB1*03:38	0.00222965	5
DRB1*04:01	0.0345596	22
DRB1*04:02	0.000743218	1
DRB1*04:03	0.0040877	6
DRB1*04:04	0.0423634	29
DRB1*04:05	0.0442215	28
DRB1*04:06	0.0040877	6
DRB1*04:07	0.00222965	3
DRB1*04:08	0.0245262	22
DRB1*04:10	0.137867	49
DRB1*04:11	0.0200669	18
DRB1*04:12	0.0464511	27
DRB1*04:13	0.06466	29
DRB1*04:14	0	0
DRB1*04:15	0.0211817	15
DRB1*04:16	0.0345596	22
DRB1*04:24	0.0107767	12
DRB1*04:34	0.0761799	38
DRB1*04:36	0.0211817	15
DRB1*04:37	0.00929023	9
DRB1*04:38	0.00631735	7
DRB1*07:01	0.0862133	43
DRB1*07:04	0.0215533	22
DRB1*08:01	0.0780379	44
DRB1*08:02	0.00297287	5
DRB1*08:03	0.113712	49
DRB1*08:04	0.0824972	43
DRB1*08:05	0.294686	62
DRB1*08:06	0.483092	68
DRB1*08:07	0.00594575	10
DRB1*08:08	0.00668896	9
DRB1*08:09	0.00297287	5
DRB1*08:10	0.512077	69
DRB1*08:11	0.00668896	9
DRB1*08:12	0.473802	68
DRB1*08:18	0.307692	64
DRB1*09:01	0.0386473	31
DRB1*09:02	0.0442215	32
DRB1*10:01	0.0568562	29
DRB1*11:01	0.0761799	46
DRB1*11:02	0.0271275	27
DRB1*11:03	0.0672612	38
DRB1*11:04	0.256039	61
DRB1*11:05	0.090301	46
DRB1*11:06	0.223337	56
DRB1*11:08	0.212189	58
DRB1*11:09	0.0761799	46
DRB1*11:10	0.0761799	46
DRB1*11:11	0.00371609	5
DRB1*11:12	0.0761799	46
DRB1*11:13	0.177258	54
DRB1*11:14	0.00668896	6
DRB1*11:15	0.0761799	46
DRB1*11:16	0.0271275	27
DRB1*11:19	0.0728354	40
DRB1*11:27	0.0587142	41
DRB1*11:30	0.0215533	20
DRB1*11:32	0.0293571	26
DRB1*11:34	0.37644	66
DRB1*11:37	0.0382757	30
DRB1*11:41	0.0460795	35
DRB1*11:42	0.424006	68
DRB1*11:43	0.256039	61
DRB1*11:68	0.023783	24
DRB1*12:01	0.342995	66
DRB1*12:02	0.312523	64
DRB1*12:03	0.36269	66
DRB1*12:04	0.25641	60
DRB1*12:05	0.342995	66
DRB1*12:06	0.342995	66
DRB1*12:08	0.373096	66
DRB1*12:10	0.342995	66
DRB1*12:17	0.342995	66
DRB1*13:01	0.0271275	27
DRB1*13:02	0.00668896	6
DRB1*13:03	0.14084	50
DRB1*13:04	0.173913	53
DRB1*13:05	0.0761799	46
DRB1*13:06	0.230398	57
DRB1*13:07	0.0382757	30
DRB1*13:09	0.0865849	42
DRB1*13:10	0.123374	52
DRB1*13:11	0.256039	61
DRB1*13:12	0.217391	58
DRB1*13:14	0.0761799	46
DRB1*13:17	0.0516537	33
DRB1*13:18	0.090301	48
DRB1*13:20	0.146042	51
DRB1*13:21	0.318097	63
DRB1*13:22	0.0271275	27
DRB1*13:23	0.00668896	6
DRB1*13:26	0.0349313	30
DRB1*13:27	0.0208101	24
DRB1*13:29	0.023783	24
DRB1*13:31	0.00222965	2
DRB1*13:34	0.00668896	6
DRB1*13:36	0.00445931	4
DRB1*13:37	0.0148644	20
DRB1*13:39	0.00668896	6
DRB1*13:42	0.256039	61
DRB1*13:49	0.242289	60
DRB1*13:67	0.00557414	4
DRB1*13:83	0.0271275	27
DRB1*14:01	0.0219249	22
DRB1*14:02	0.130435	51
DRB1*14:03	0.0356745	29
DRB1*14:04	0.0549981	34
DRB1*14:05	0.0163508	20
DRB1*14:06	0.357488	64
DRB1*14:07	0.000371609	1
DRB1*14:08	0.0163508	20
DRB1*14:09	0.120401	48
DRB1*14:10	0	0
DRB1*14:12	0.187291	55
DRB1*14:13	0.398737	67
DRB1*14:14	0.00148644	3
DRB1*14:15	0.0824972	43
DRB1*14:17	0.37644	66
DRB1*14:18	0.0234114	25
DRB1*14:19	0.0955035	46
DRB1*14:21	0.323671	65
DRB1*14:22	0.0605723	41
DRB1*14:25	0.0605723	41
DRB1*14:39	0.0159792	17
DRB1*14:43	0.0163508	20
DRB1*14:54	0.0219249	22
DRB1*15:01	0.0416202	32
DRB1*15:02	0.00483092	9
DRB1*15:03	0.0490524	38
DRB1*15:04	0.0471944	33
DRB1*15:05	0.158305	53
DRB1*15:06	0.0416202	32
DRB1*15:09	0.0416202	32
DRB1*15:10	0.0174656	19
DRB1*15:11	0.00185805	4
DRB1*16:01	0.015236	20
DRB1*16:02	0.0895578	43
DRB1*16:03	0.015236	20
DRB1*16:04	0.00148644	4
DRB1*16:05	0.0196953	21
DRB1*16:09	0.03233	25
DRB1*16:15	0.0992196	45

## Sheet: Figure S9
Panel A			Panel B			Panel C			Panel D			Panel E			Panel F
Population Cluster	Intracellular pathogen diversity	Predicted population-level promiscuity	Population Cluster	Extracellular pathogen diversity	In vitro population-level promiscuity	Population Cluster	Intracellular pathogen diversity	Predicted population-level promiscuity	Population Cluster	Extracellular pathogen diversity	In vitro population-level promiscuity	Population Cluster	Intracellular pathogen diversity	Predicted population-level promiscuity	Population Cluster	Extracellular pathogen diversity	In vitro population-level promiscuity
1	109.533	0.293228	1	99.4667	0.293228	1	101	-0.101184	1	120	-0.101184	1	113.667	0.307826	1	114	0.307826
2	114.8	0.285926	2	129.3	0.285926	2	113	0.0549445	2	129.143	0.0549445	2	127.4	0.16811	2	129	0.16811
3	101	-0.270958	3	120	-0.270958	3	113.308	-0.0115145	3	99.6154	-0.0115145	3	112.4	0.109726	3	102.2	0.109726
4	115.429	0.217697	4	121.429	0.217697	4	119.231	0.541555	4	113.615	0.541555	4	93.3333	0.00621831	4	96	0.00621831
5	115.667	0.0222184	5	126.667	0.0222184	5	120.667	0.120036	5	127	0.120036	5	121	-0.139825	5	114.8	-0.139825
6	119.6	0.144036	6	110.5	0.144036	6	94.8	0.258745	6	94	0.258745	6	112.7	0.295021	6	127.7	0.295021
7	120.333	0.183124	7	108.333	0.183124	7	120.25	0.639197	7	113.25	0.639197	7	101	0.175106	7	120	0.175106
8	116.143	0.193121	8	113.143	0.193121	8	101	0.13506	8	120	0.13506	8	106	0.000804175	8	113.5	0.000804175
9	122	0.289014	9	136	0.289014	9	120.714	0.0178064	9	133.286	0.0178064	9	104.6	0.385988	9	126	0.385988
10	101	0.0442873	10	120	0.0442873	10	107.75	0.0657299	10	99.25	0.0657299	10	101	0.370262	10	120	0.370262
11	131	0.763988	11	119	0.763988	11	110.5	0.0513783	11	125.5	0.0513783	11	107	-0.359827	11	106	-0.359827
12	98.25	0.202672	12	116.75	0.202672	12	101	0.231126	12	120	0.231126	12	137	0.16961	12	133	0.16961
13	102.333	-0.0279326	13	113.333	-0.0279326	13	137	0.00392116	13	133	0.00392116	13	122	-0.131231	13	128.333	-0.131231
14	111.5	0.229216	14	100	0.229216	14	104	0.197462	14	122	0.197462	14	111	-0.0148405	14	105	-0.0148405
15	107	-0.188592	15	106	-0.188592	15	107	-0.000875134	15	106	-0.000875134	15	105.5	-0.0730464	15	94	-0.0730464
16	101	0.16929	16	120	0.16929	16	108	0.0911264	16	130.667	0.0911264	16	122	0.220439	16	136	0.220439
17	97	0.342483	17	91	0.342483	17	111.5	-0.180358	17	100.5	-0.180358	17	126	-0.326716	17	114	-0.326716
18	133.333	0.635711	18	121.333	0.635711	18	126	0.295509	18	114	0.295509	18	122	0.159219	18	136	0.159219
19	122	0.463995	19	136	0.463995	19	125	0.719809	19	113	0.719809	19	122	0.169804	19	136	0.169804
20	137	0.702852	20	133	0.702852	20	97	0.410298	20	92	0.410298	20	105	0.0555738	20	100	0.0555738
21	117	0.132867	21	110	0.132867	21	137	0.0364875	21	125	0.0364875	21	109	-0.101937	21	105	-0.101937
22	122	0.152667	22	136	0.152667	22	137	0.444023	22	125	0.444023	22	107	-0.331989	22	106	-0.331989
23	107	-0.496745	23	106	-0.496745	23	110	0.0463719	23	114	0.0463719	23	119	0.248837	23	111	0.248837
24	119	0.338531	24	111	0.338531	24	122	0.676386	24	136	0.676386	24	114	-0.0644748	24	127	-0.0644748
25	126	0.988855	25	114	0.988855	25	122	0.300372	25	136	0.300372	25	107	-0.00806624	25	124	-0.00806624
26	110	0.212417	26	111	0.212417	26	122	0.16062	26	136	0.16062	26	110	0.314653	26	111	0.314653
27	112	0.498825	27	98	0.498825	27	122	0.465303	27	136	0.465303	27	111	-0.000522566	27	95	-0.000522566
28	101	0.110247	28	120	0.110247	28	122	0.886054	28	136	0.886054	28	112	-0.124293	28	98	-0.124293
29	107	0.307515	29	124	0.307515	29	107	-0.117144	29	106	-0.117144	29	101	0.0354009	29	120	0.0354009
30	101	-0.350852	30	120	-0.350852	30	119	0.101527	30	111	0.101527	30	101	0.499436	30	120	0.499436
31	107	0.329362	31	93	0.329362	31	126	0.783362	31	114	0.783362	31	101	-0.00949949	31	120	-0.00949949
						32	110	0.0961443	32	111	0.0961443	32	101	0.636798	32	120	0.636798
						33	112	-0.363714	33	98	-0.363714	33	101	0.178445	33	120	0.178445
						34	101	1.30444	34	120	1.30444	34	101	-0.250836	34	120	-0.250836
						35	101	-0.0218623	35	120	-0.0218623
						36	101	-0.0222455	36	120	-0.0222455
						37	101	-0.134409	37	120	-0.134409
						38	90	0.0156206	38	91	0.0156206
